# Supplementary material for: Identification of Passion Fruit Oil Adulteration by Chemometric Analysis of FTIR Spectra
Source: Molecules. 2019 Sep 4;24(18):3219. doi: 10.3390/molecules24183219 (PMC6767306; doi:10.3390/molecules24183219)
Supplement: Supplementary file 1 [file molecules-24-03219-s001.csv]

4000.4	0.022681	0.0068699	0.0039388	0.011344	0.018035	0.020363
3999.4	0.024548	0.013379	0.00072148	0.0081091	0.014516	0.022035
3998.5	0.020933	0.012984	0.0099283	0.0052592	0.0079757	0.0091993
3997.6	0.013191	0.0027574	0.013662	0.012916	0.0047917	0.0024291
3996.6	0.0078466	1.4272e-05	0.010657	0.018896	0.012951	0.0082593
3995.7	0.0071632	0.0039283	0.017475	0.017389	0.017999	0.016159
3994.8	0.0098091	0.001637	0.0246	0.011827	0.013641	0.017902
3993.8	0.0068829	0.0038047	0.01859	0.011552	0.0097972	0.013628
3992.9	0.0081861	0.010823	0.015998	0.016893	0.0040829	0.0079717
3992	0.017041	0.010012	0.018058	0.013329	0.00055043	-0.0017851
3991	0.019479	0.008763	0.012079	0.0084181	0.003459	-0.00027484
3990.1	0.015508	0.0066048	0.002617	0.0059868	0.0062836	0.010921
3989.2	0.010563	0.0020191	-0.00037076	0.0082674	0.010111	0.013309
3988.3	0.0051827	0.00036284	0.0056516	0.014344	0.01595	0.0095064
3987.3	0.0041639	0.0067717	0.0097026	0.012309	0.017209	0.010071
3986.4	0.0066629	0.011705	0.0090297	0.012899	0.01343	0.016558
3985.5	0.0089756	0.0097518	0.0075588	0.010502	0.0053723	0.017021
3984.5	0.013508	0.011057	0.0030971	0.0022842	-0.00097277	0.013684
3983.6	0.019878	0.014053	-0.0027687	0.0034306	-0.0016901	0.01089
3982.7	0.018355	0.017077	0.0048671	0.0091522	0.0071191	0.011789
3981.7	0.014871	0.017885	0.019079	0.0097595	0.017107	0.012663
3980.8	0.023506	0.013546	0.021215	0.0092547	0.013164	0.011428
3979.9	0.03092	0.010535	0.009419	0.010483	0.0053234	0.010477
3978.9	0.028715	0.0078818	0.0043671	0.013716	0.0096544	0.0068117
3978	0.024069	0.0094981	0.014613	0.01818	0.012355	0.0094967
3977.1	0.016993	0.011939	0.021843	0.011741	0.0056006	0.01516
3976.1	0.009662	0.0036584	0.016169	0.01269	0.0030435	0.011384
3975.2	0.0076315	0.0030563	0.0045045	0.024957	0.0024838	0.0051324
3974.3	0.00958	0.0080946	0.0027923	0.021084	0.0058629	0.0051817
3973.3	0.014025	0.011047	0.006396	0.014899	0.0075903	0.015274
3972.4	0.01568	0.012521	0.0057957	0.014205	0.0039772	0.020609
3971.5	0.012909	0.0083594	0.0058503	0.0165	0.009444	0.013859
3970.5	0.0095684	0.0082453	0.0069397	0.019382	0.013349	0.013997
3969.6	0.0086582	0.0098576	0.0083153	0.011807	0.013544	0.013947
3968.7	0.0077193	0.0075146	0.010072	0.0070711	0.014671	0.0056681
3967.8	0.010241	0.0056706	0.017738	0.014533	0.011042	0.00010522
3966.8	0.016328	0.010681	0.020048	0.014646	0.014102	-0.00076728
3965.9	0.011268	0.017097	0.015223	0.013822	0.021188	0.0046518
3965	0.00062713	0.013023	0.0076135	0.014759	0.011722	0.010522
3964	0.0006172	0.0067188	0.0043123	0.01151	0.0059741	0.0043864
3963.1	0.0027471	0.0088264	0.010398	0.010261	0.0098703	0.00074304
3962.2	0.0055245	0.0085635	0.020272	0.010821	0.0094564	0.011805
3961.2	0.0095325	0.0036874	0.017016	0.0067214	0.012731	0.018129
3960.3	0.013186	0.00015548	0.011298	0.0047365	0.015734	0.01974
3959.4	0.015541	-0.001019	0.006795	0.011913	0.012212	0.014471
3958.4	0.011944	0.0037226	0.0024058	0.015207	0.012074	0.0093798
3957.5	0.011813	0.010737	0.0061803	0.011182	0.0092262	0.0074782
3956.6	0.010555	0.016859	0.0043137	0.010967	0.0024994	0.004571
3955.6	0.0088065	0.02103	0.0045524	0.01368	-0.0044738	0.0085727
3954.7	0.011049	0.020521	0.008964	0.014031	-0.0015129	0.014817
3953.8	0.0062626	0.014194	0.013799	0.017149	0.0048464	0.013025
3952.8	0.0055545	0.014692	0.020716	0.015646	0.0086114	0.014741
3951.9	0.013003	0.019284	0.015076	0.01224	0.0091383	0.015902
3951	0.015961	0.017149	0.0087415	0.013015	0.0088371	0.0097436
3950	0.015663	0.0053785	0.015133	0.013069	0.015467	0.0092584
3949.1	0.011079	0.0082027	0.016619	0.011387	0.016606	0.0117
3948.2	0.011526	0.015745	0.0092963	0.011852	0.013594	0.014512
3947.3	0.014664	0.0096786	0.0061675	0.015152	0.014034	0.011416
3946.3	0.01043	0.0067092	0.0060855	0.012198	0.012328	0.0031347
3945.4	0.0076788	0.0041547	0.008891	0.0084945	0.011743	0.0029733
3944.5	0.0069826	0.00045122	0.013755	0.0079209	0.018258	0.012341
3943.5	0.0098792	-0.0035895	0.010737	0.0043965	0.020994	0.011094
3942.6	0.013307	0.0042543	0.0095223	0.002582	0.014867	0.0068483
3941.7	0.015522	0.010665	0.010063	0.015974	0.0018307	0.0090913
3940.7	0.01757	0.0078208	0.012653	0.018293	-0.0032341	0.012203
3939.8	0.014645	0.012191	0.016467	0.013262	0.0014723	0.011417
3938.9	0.014185	0.016067	0.012239	0.017112	-0.0031202	0.013124
3937.9	0.016759	0.013424	0.01121	0.014883	-0.0038982	0.013014
3937	0.011509	0.0099985	0.01154	0.010446	0.0069106	0.016598
3936.1	0.0073967	0.0099275	0.0093417	0.013261	0.011447	0.020073
3935.1	0.0072681	0.011649	0.010038	0.016904	0.0078031	0.018011
3934.2	0.013604	0.0090093	0.010059	0.015999	0.0088934	0.013832
3933.3	0.017694	0.0076736	0.0061494	0.015563	0.012469	0.0097168
3932.3	0.018978	0.0073224	0.0018974	0.014437	0.0018137	0.011624
3931.4	0.022066	0.0087253	0.010329	0.016367	-0.0049152	0.0079247
3930.5	0.013542	0.015736	0.015818	0.017174	0.0098494	0.0047369
3929.5	0.010023	0.012258	0.014375	0.013777	0.01559	0.0083276
3928.6	0.010409	0.0083954	0.014791	0.013587	0.0046149	0.014417
3927.7	0.006406	0.009714	0.011143	0.010763	0.0058592	0.010605
3926.8	0.010816	0.011733	0.0058146	0.0014046	0.015465	0.0055522
3925.8	0.016981	0.010745	0.004733	0.00081212	0.013751	0.010582
3924.9	0.010784	0.0033846	0.0059405	0.013566	0.0076408	0.0079855
3924	0.0059365	-1.9022e-06	0.012655	0.024962	0.0018924	0.0035262
3923	0.014427	0.0072819	0.010346	0.017319	0.001948	0.00976
3922.1	0.015662	0.016345	0.0068136	0.0088717	0.0091034	0.011458
3921.2	0.013061	0.01899	0.0095092	0.013687	0.0095893	0.011677
3920.2	0.01298	0.013666	0.0058581	0.017363	0.012772	0.018047
3919.3	0.016198	0.0082982	0.0060804	0.013242	0.014375	0.018055
3918.4	0.011545	0.0081984	0.0079017	0.010655	0.014134	0.012591
3917.4	0.01036	0.0072178	0.0043373	0.01376	0.01535	0.010453
3916.5	0.010643	0.0032505	0.0061318	0.015872	0.0081237	0.0054483
3915.6	0.01029	0.0041652	0.0101	0.013017	-0.00044457	0.0035073
3914.6	0.013249	0.0081604	0.012275	0.012851	0.0013431	0.0055324
3913.7	0.013824	0.010572	0.019581	0.01595	0.0070071	0.0046595
3912.8	0.014748	0.011502	0.017457	0.017105	0.0091037	0.008911
3911.8	0.0084374	0.016584	0.0038561	0.0079404	0.010318	0.010247
3910.9	0.01444	0.018998	0.0048102	-0.00017902	0.0063164	0.012679
3910	0.017369	0.020047	0.015115	0.0073578	-0.00082444	0.014805
3909	0.012761	0.016937	0.01365	0.019982	-0.004332	0.017345
3908.1	0.011215	0.007399	0.0073172	0.020903	0.001729	0.019743
3907.2	0.007244	0.0072024	0.0066823	0.008711	0.0085868	0.012581
3906.3	0.0066992	0.011859	0.012846	0.0075581	0.0081631	0.0037841
3905.3	0.012669	0.0075652	0.015079	0.0097873	0.011046	0.008902
3904.4	0.010134	0.006667	0.010387	0.011378	0.011753	0.013184
3903.5	0.0044396	0.011338	0.0027219	0.011389	0.0078117	0.0095258
3902.5	0.0071255	0.0098398	0.0019573	0.014777	0.01432	0.012532
3901.6	0.011097	0.012192	-0.0013117	0.016794	0.017043	0.014062
3900.7	0.010054	0.010772	-0.0036503	0.015445	0.010968	0.0061812
3899.7	0.011285	0.0042571	-0.0014446	0.0083663	0.011688	0.0092149
3898.8	0.011295	0.0015295	0.01093	0.0063759	0.017117	0.016486
3897.9	0.0064873	0.0041061	0.018295	0.012593	0.015719	0.015196
3896.9	0.0081699	0.0063331	0.0015447	0.015362	0.0087464	0.0062124
3896	0.014055	0.0041358	-0.0099127	0.0093002	0.009829	0.0024868
3895.1	0.018499	0.0023765	-0.0027495	0.010154	0.016602	0.0078558
3894.1	0.021248	0.010281	0.005909	0.016985	0.011444	0.014534
3893.2	0.020623	0.012546	0.015203	0.021018	0.011875	0.01462
3892.3	0.01853	0.010096	0.020304	0.014357	0.012606	0.0089203
3891.3	0.014175	0.0088369	0.017164	0.011021	0.0065592	0.0063901
3890.4	0.015948	0.0063474	0.011775	0.016938	0.0034687	0.0084945
3889.5	0.020684	0.0086731	0.010026	0.01423	0.0063763	0.010114
3888.5	0.013311	0.0055594	0.014236	0.0076027	0.0064513	0.0045108
3887.6	0.010642	0.0024263	0.013643	0.0084604	-0.00044873	0.005179
3886.7	0.0089493	0.003817	0.013888	0.014053	-0.00127	0.014166
3885.7	0.0057163	0.0075563	0.015932	0.017195	0.0050824	0.014077
3884.8	0.0086118	0.011078	0.0083868	0.012432	0.013029	0.0095475
3883.9	0.013269	0.011501	0.008344	0.0049257	0.017276	0.014738
3883	0.017202	0.0093823	0.018933	0.0086459	0.012595	0.010242
3882	0.017247	0.0035242	0.02226	0.016524	0.0050582	0.00075177
3881.1	0.019762	0.0063982	0.014266	0.017767	0.0050763	-0.0019358
3880.2	0.015122	0.014123	0.0041816	0.014585	0.01259	0.0067398
3879.2	0.012601	0.010577	0.0082177	0.0078695	0.0098088	0.017723
3878.3	0.01107	0.0059573	0.014784	0.0059483	0.0065259	0.019924
3877.4	0.010006	0.0055146	0.0085803	0.01299	0.0069883	0.014594
3876.4	0.010009	0.0092351	-0.0028291	0.010341	0.008025	0.013938
3875.5	0.013887	0.018588	-0.0023771	-0.00038271	0.0050137	0.015336
3874.6	0.014273	0.016256	0.0055839	-0.0042836	0.0036435	0.012753
3873.6	0.016973	0.011318	0.0056375	0.010672	0.0036139	0.015293
3872.7	0.022758	0.012882	0.0077165	0.018611	0.0067616	0.013335
3871.8	0.010048	0.0061263	0.0065203	0.0099704	0.016387	0.006965
3870.8	0.00071639	0.0029236	-8.6731e-05	0.0027741	0.014427	0.0053615
3869.9	0.0052314	0.0062044	0.0026299	0.0047231	0.008545	0.0040372
3869	0.0098474	0.0070258	0.007953	0.0078422	0.013476	0.0027706
3868	0.011458	0.0056796	0.014384	0.014313	0.011869	0.0065656
3867.1	0.018034	0.0084525	0.019762	0.019022	0.0099525	0.0048062
3866.2	0.018601	0.015469	0.020643	0.016247	0.013677	2.9065e-05
3865.2	0.015366	0.016921	0.016441	0.011797	0.010749	0.014623
3864.3	0.017186	0.0097139	0.0084766	0.012328	0.0039108	0.022803
3863.4	0.018176	0.009385	0.0089062	0.018787	0.0055093	0.016085
3862.5	0.012315	0.01261	0.0086467	0.016519	0.0069705	0.013603
3861.5	0.0077552	0.0071715	0.0010117	0.0047517	0.0053474	0.011287
3860.6	0.0035689	0.0013103	0.0013505	0.0062852	0.013612	0.0063546
3859.7	0.0040058	0.0049767	0.0066865	0.0091141	0.018582	0.0090365
3858.7	0.0085014	0.012484	0.0081506	0.0071539	0.014277	0.013062
3857.8	0.0083093	0.013039	0.0069672	0.013039	0.012759	0.018934
3856.9	0.007096	0.014514	0.011266	0.013035	0.012327	0.010109
3855.9	0.015385	0.016573	0.0099556	0.011664	-0.00027095	0.0015729
3855	0.021669	0.0069122	0.0033723	0.0074486	-0.00069443	0.0094532
3854.1	0.016678	0.0063512	0.005658	0.0035581	0.0019313	0.0095453
3853.1	0.014064	0.0065561	0.0077771	0.0067814	0.0020419	0.010463
3852.2	0.010465	0.0016495	0.0098481	0.010726	0.0028871	0.012069
3851.3	0.0072039	-0.00072047	0.011114	0.007353	0.0051488	0.016568
3850.3	0.0054631	0.0075776	0.0082428	0.0049933	0.0039396	0.010471
3849.4	0.0082887	0.0095537	0.0077615	0.0094273	0.0059459	0.0059475
3848.5	0.0067192	0.010066	0.011495	0.016905	0.006278	0.014531
3847.5	0.0031979	0.0097023	0.010059	0.018424	0.0087988	0.021256
3846.6	0.0035525	0.0017528	0.0081716	0.015213	0.011961	0.015287
3845.7	0.0089168	0.00043428	0.013107	0.01094	0.0097581	0.0091617
3844.7	0.012812	0.0050266	0.019324	0.0081809	0.012198	0.010662
3843.8	0.014898	0.002657	0.020573	0.0099417	0.0089952	0.017477
3842.9	0.014154	0.0046834	0.020585	0.018679	0.0071132	0.012115
3842	0.018217	0.0094973	0.020962	0.016633	0.014018	0.00053744
3841	0.023937	0.011217	0.012663	0.014086	0.01966	-0.0043899
3840.1	0.017492	0.0064279	0.0057855	0.013642	0.013266	0.0054203
3839.2	0.014889	-0.00070504	0.0049677	0.01423	0.0073958	0.010448
3838.2	0.007086	-0.0043942	0.00024602	0.012073	0.0055853	0.008739
3837.3	0.0042973	0.010177	-0.00333	0.0081447	0.0023077	0.010152
3836.4	0.013445	0.020358	0.0035449	0.0096677	0.0029614	0.01164
3835.4	0.019015	0.008927	0.0076848	0.0093186	0.0051518	0.014663
3834.5	0.017592	0.0094315	0.0087054	0.0097928	0.0070267	0.011143
3833.6	0.014629	0.017616	0.014457	0.019327	0.0087275	0.0066133
3832.6	0.011147	0.0066951	0.017874	0.017707	0.0090102	0.0043378
3831.7	0.012484	0.0017342	0.010664	0.0059985	0.0036908	0.0067594
3830.8	0.011346	0.0083097	0.01089	0.0010659	-0.0010765	0.011633
3829.8	0.012458	0.010245	0.0077656	-0.0010103	0.0061808	0.0054366
3828.9	0.011875	0.015959	0.0099701	0.0015961	0.007813	0.0034139
3828	0.004513	0.021602	0.014318	0.012884	0.0048344	0.0087899
3827	0.0049189	0.019072	0.0044804	0.018561	0.0053588	0.0087062
3826.1	0.015021	0.010356	0.002325	0.01095	0.0026448	0.015047
3825.2	0.017287	0.014715	0.014981	0.0065113	0.0040511	0.017554
3824.2	0.014886	0.018631	0.018648	0.019873	0.014573	0.013957
3823.3	0.0068652	0.0086425	0.0078151	0.028414	0.016096	0.0068447
3822.4	0.0070297	0.0058703	-0.0045506	0.019565	0.0067082	0.001751
3821.5	0.0097714	0.0054015	-0.0030273	0.010656	-0.00047688	0.0051986
3820.5	0.012355	0.0048129	0.0034542	0.008089	0.003666	0.0049189
3819.6	0.013667	0.010303	0.0043622	0.0098849	0.0092765	0.0045824
3818.7	0.0067666	0.011381	0.0037811	0.015249	0.011386	0.014351
3817.7	0.0095305	0.01114	0.0094923	0.011845	0.013027	0.010858
3816.8	0.012505	0.006729	0.0073568	0.01014	0.013046	0.0052451
3815.9	0.011735	-0.00062481	0.0070081	0.0095123	0.0092658	0.0056119
3814.9	0.015562	-0.00098818	0.012023	0.0069033	0.0082157	-0.00039677
3814	0.013489	-0.0023191	0.0053791	0.016056	0.011684	0.00049301
3813.1	0.0055519	-0.00098638	0.00099257	0.018102	0.016451	0.0087664
3812.1	0.0045726	0.0039221	0.0048904	0.01379	0.010184	0.011023
3811.2	0.0065649	0.0049318	0.0069862	0.014324	0.0015475	0.012291
3810.3	0.015902	0.0058125	0.0060569	0.012886	0.0075384	0.018481
3809.3	0.017366	0.011212	0.011065	0.0099789	0.0094156	0.012429
3808.4	0.013698	0.0099759	0.014674	0.011642	0.0048847	0.0056977
3807.5	0.013906	0.0043522	0.013873	0.013624	0.0051946	0.013663
3806.5	0.012452	0.0057687	0.015997	0.012079	0.0040895	0.015521
3805.6	0.012819	0.006371	0.014495	0.010197	0.0037493	0.0094497
3804.7	0.011342	0.017251	0.0069863	0.0060571	0.0069779	0.011671
3803.7	0.0063157	0.020845	-0.00087882	0.0078071	0.011012	0.01245
3802.8	0.0080091	0.011519	-0.0050685	0.011935	0.0099877	0.0044264
3801.9	0.015925	0.0083754	0.0056504	0.0096055	0.004246	0.0040644
3801	0.018827	0.0081356	0.015942	0.010905	0.0011702	0.0024661
3800	0.012603	0.0061198	0.0095521	0.017188	0.0091114	0.0023875
3799.1	0.011139	0.011164	0.0042005	0.015363	0.01333	0.0028588
3798.2	0.0092296	0.010898	0.0043053	0.015039	0.0075421	0.004082
3797.2	0.006685	0.004808	0.0024065	0.013769	0.0067992	0.0074699
3796.3	0.006763	-9.0587e-05	0.0068219	0.01285	0.011989	0.010149
3795.4	0.0084752	-0.002227	0.011224	0.012672	0.0152	0.012287
3794.4	0.015806	-3.2914e-05	0.0092849	0.013375	0.010581	0.0096659
3793.5	0.012306	0.0060699	0.0076593	0.010771	0.011217	0.0025038
3792.6	0.0067006	0.012169	0.00038562	0.0097499	0.014947	0.0045616
3791.6	0.0087413	0.012403	0.0032034	0.012944	0.012557	0.014225
3790.7	0.014401	0.0044059	0.0051724	0.014566	0.0091094	0.014596
3789.8	0.014397	0.0018371	0.00083946	0.014462	0.010447	0.0066127
3788.8	0.0051715	0.0073372	-0.0011418	0.010939	0.013023	-0.0012209
3787.9	0.002303	0.0040154	0.0014565	0.006213	0.015012	-0.0022048
3787	0.012625	0.0049731	0.0030679	0.0045276	0.013773	0.0052232
3786	0.015503	0.0070488	0.0058039	0.010158	0.0078615	0.010267
3785.1	0.014942	0.011454	0.0076978	0.010816	0.0021206	0.015307
3784.2	0.01887	0.014901	0.0082432	0.0059337	0.0022862	0.013049
3783.2	0.014211	0.013151	0.0055019	0.0062696	0.012418	0.0052095
3782.3	0.0087242	0.0077422	0.0033665	0.013618	0.019261	-0.00055732
3781.4	0.0066348	0.0033182	0.0044026	0.014116	0.015674	0.0063574
3780.5	0.0086037	0.010083	0.010215	0.0084596	0.0094657	0.017346
3779.5	0.0097009	0.011553	0.013453	0.0071702	0.0052606	0.015371
3778.6	0.0074626	0.0049206	0.010173	0.0090514	0.00078278	0.0031531
3777.7	0.0097957	0.0014798	0.002435	0.0077437	-0.005286	0.00031519
3776.7	0.010593	-0.0014617	0.011244	0.013014	-0.0020422	0.0055775
3775.8	0.013091	0.00090503	0.013263	0.016378	0.00093189	0.012247
3774.9	0.01406	0.010274	0.01072	0.017545	0.005459	0.018631
3773.9	0.016126	0.0090393	0.019167	0.020715	0.0093828	0.012758
3773	0.01849	0.0071313	0.023959	0.017227	0.011526	0.0077506
3772.1	0.015711	0.0084241	0.011798	0.012767	0.0079326	0.01591
3771.1	0.011902	0.017712	0.0040147	0.019344	0.0056394	0.0158
3770.2	0.0092365	0.018042	0.0069001	0.02177	-0.002043	0.012222
3769.3	0.0019756	0.0051127	0.0043802	0.010369	0.00033958	0.0082266
3768.3	0.0078198	0.0050251	0.0023515	0.0078506	0.012397	0.003633
3767.4	0.013514	0.012146	0.0057487	0.010431	0.011366	-0.0041108
3766.5	0.016414	0.015444	0.00674	0.010415	0.0026743	-0.0034854
3765.5	0.018873	0.014987	0.013892	0.0097431	0.007024	0.007341
3764.6	0.01628	0.010993	0.022173	0.010375	0.013458	0.014228
3763.7	0.012251	0.0081517	0.016096	0.01187	0.010438	0.011683
3762.7	0.010558	0.0087812	0.0078335	0.010015	0.0051149	0.0070411
3761.8	0.0036737	0.016679	0.0021498	0.010704	0.0053326	0.00158
3760.9	0.0021478	0.016071	0.0055496	0.015232	0.0087489	0.0069803
3760	0.013691	0.005678	0.01445	0.020301	0.013044	0.0094934
3759	0.012772	-0.00026343	0.01142	0.015422	0.013094	0.00081622
3758.1	0.012035	1.6701e-05	0.0032883	0.013121	0.0030476	0.0007717
3757.2	0.016406	0.013387	0.0035884	0.016148	0.0046775	0.0058679
3756.2	0.018611	0.017081	0.0066854	0.0083709	0.010555	0.0070338
3755.3	0.013391	0.0025868	0.013524	0.010157	0.013144	0.0092874
3754.4	0.010226	0.00045071	0.022944	0.01592	0.0058299	0.012625
3753.4	0.007424	0.0067611	0.020475	0.01338	0.0055386	0.012879
3752.5	0.0066499	0.0090106	0.013336	0.014002	0.011272	0.010082
3751.6	0.0077634	0.0047111	0.011435	0.016932	0.014768	0.0081881
3750.6	0.0076876	0.0045846	0.013014	0.015099	0.011876	0.0074618
3749.7	0.010591	0.0013728	0.0082942	0.015662	0.016328	0.012452
3748.8	0.0088253	-0.0028257	-0.00022042	0.010538	0.014113	0.013954
3747.8	0.011471	-0.00011444	0.0022049	0.010534	-0.00059348	0.011344
3746.9	0.00867	-0.00064428	0.0082663	0.0095244	-0.00077573	0.01329
3746	0.005392	0.0050876	0.0124	0.0098937	0.0045572	0.0079635
3745	0.0055733	0.0086047	0.0087681	0.011692	0.0070825	-6.0006e-05
3744.1	0.0072946	0.0065927	0.006815	0.017441	0.0050793	-0.0013744
3743.2	0.0024507	0.0011687	0.0079829	0.017456	-0.00076207	0.0056157
3742.2	0.0051846	-0.00089231	-0.0016304	0.010111	0.0050483	0.013911
3741.3	0.0060458	0.0061035	-0.005523	0.0061291	0.011417	0.01483
3740.4	0.0040922	0.012427	0.0016008	0.01236	0.011623	0.011443
3739.5	0.0083692	0.015715	0.011708	0.017608	0.0082394	0.010332
3738.5	0.013711	0.017243	0.015668	0.018601	0.0081424	0.0019657
3737.6	0.014454	0.013626	0.010942	0.017069	0.0096438	-0.00071044
3736.7	0.01701	0.0088145	0.0109	0.016135	0.0076239	0.01021
3735.7	0.016787	0.0088376	0.011466	0.017073	0.0080817	0.0084249
3734.8	0.015679	0.011937	0.011052	0.018431	0.0058003	0.0017197
3733.9	0.011214	0.0064698	0.011925	0.011908	0.0065853	0.004538
3732.9	0.0036142	0.0024369	0.0093443	0.00618	0.013849	0.003718
3732	0.0045116	0.0090835	0.0091126	0.007113	0.0082391	0.0047059
3731.1	0.0088511	0.011694	0.0087382	0.0041416	0.0019343	0.010864
3730.1	0.008482	0.008673	0.0099463	0.0044178	0.010471	0.013755
3729.2	0.0063393	0.0079738	0.010799	0.0074323	0.014317	0.011643
3728.3	0.0044871	0.0077615	0.010606	0.011103	0.0085994	0.0093137
3727.3	0.0056849	0.0025063	0.0054694	0.011826	0.0051012	0.0081313
3726.4	0.011777	7.1959e-05	0.0049772	0.0033677	0.0098868	0.010248
3725.5	0.014629	0.0044655	0.0092085	0.0048087	0.013253	0.0114
3724.5	0.013342	0.0057873	0.0078917	0.011565	0.0095027	0.0094848
3723.6	0.010189	0.007988	0.01198	0.01061	0.012497	0.011373
3722.7	0.01147	0.013472	0.019452	0.011054	0.0088867	0.014297
3721.7	0.013187	0.015147	0.016225	0.011342	0.0016319	0.010912
3720.8	0.0050871	0.014706	0.0051773	0.0047317	-0.00069722	0.010925
3719.9	-5.3585e-05	0.0070545	0.0027525	0.0038161	0.0045808	0.012931
3719	0.0049844	0.0045012	0.0067356	0.0098488	0.010639	0.011581
3718	0.0139	0.0061542	0.0059909	0.011678	0.012933	0.005961
3717.1	0.018804	0.0093602	0.00025137	0.011665	0.013432	0.0044431
3716.2	0.020767	0.0081085	0.0040386	0.012418	0.011799	0.0054355
3715.2	0.020073	0.013083	0.0059424	0.012415	0.011086	0.0058776
3714.3	0.01435	0.01935	4.1748e-05	0.012967	0.0084809	0.011389
3713.4	0.012773	0.0092973	0.0015865	0.015059	0.0066543	0.013911
3712.4	0.013051	0.001066	0.0049577	0.018854	0.0039157	0.0058892
3711.5	0.016215	0.0041471	0.0042122	0.017794	0.0032768	-0.0014644
3710.6	0.010718	0.0055898	0.0049904	0.0084252	0.0061438	0.0029312
3709.6	0.005831	0.0048807	0.0044977	0.0042405	0.0067469	0.0097393
3708.7	0.0095718	0.0012772	0.0097945	0.010888	0.00639	0.011579
3707.8	0.0084158	0.0063184	0.012732	0.0098692	0.0069147	0.0074001
3706.8	0.0031593	0.0075455	0.011067	0.0092762	0.010435	0.0099918
3705.9	0.008136	0.0016957	0.011734	0.013633	0.0099335	0.015086
3705	0.017404	-0.0043957	0.011248	0.018928	0.0068517	0.005151
3704	0.01897	-0.0022176	0.0079551	0.019959	0.013693	-0.0013209
3703.1	0.013333	0.0077239	0.01143	0.015854	0.014499	-0.0010048
3702.2	0.015431	0.0092555	0.0089405	0.0094101	0.012627	0.0050602
3701.2	0.015146	0.0041222	0.0063451	0.0033198	0.015015	0.011962
3700.3	0.0078717	0.0013603	0.0076792	-0.0010732	0.017486	0.011403
3699.4	0.0055742	0.0051933	0.00802	0.0052934	0.011555	0.0083899
3698.5	0.003378	0.0074562	0.011923	0.011705	0.0031552	0.0049911
3697.5	-0.00013072	0.011383	0.017404	0.012069	0.0099009	0.0047128
3696.6	0.0079244	0.017442	0.011922	0.0077566	0.015412	0.0038448
3695.7	0.016812	0.010722	0.0040954	0.0024542	0.010129	0.0032628
3694.7	0.015962	0.0086599	0.00733	0.0091647	0.0096395	0.0038588
3693.8	0.011637	0.010953	0.0090728	0.014978	0.0057192	0.0091644
3692.9	0.011493	0.013791	0.0066215	0.013052	0.0016322	0.018159
3691.9	0.015259	0.012789	0.011578	0.012704	0.0049469	0.017932
3691	0.016569	0.013872	0.013044	0.0094448	0.0049314	0.011179
3690.1	0.011311	0.0099953	0.0094039	0.010527	-0.0019933	0.011875
3689.1	0.010478	0.0025699	0.01155	0.011115	-0.0004955	0.010557
3688.2	0.0072994	0.0009066	0.01438	0.018388	0.0073306	0.005558
3687.3	0.0083334	0.010133	0.0097131	0.021046	0.018065	0.0048235
3686.3	0.011017	0.014259	0.013332	0.013924	0.017166	0.00075186
3685.4	0.0078595	0.012663	0.015544	0.010862	0.0095054	0.0030743
3684.5	0.0080362	0.0087264	0.015741	0.017568	0.0078749	0.010993
3683.5	0.014113	0.004512	0.014672	0.012595	0.010187	0.0060646
3682.6	0.011933	0.0062267	0.010387	0.011988	0.0060834	-0.0008437
3681.7	0.010729	0.0031822	0.0068574	0.013821	0.0058018	0.0047425
3680.7	0.0092367	0.00030955	0.0042234	0.011795	0.017496	0.007138
3679.8	0.0095207	0.0011327	0.0032361	0.012284	0.014146	0.010306
3678.9	0.015171	0.0063438	0.00020729	0.0094891	0.0047446	0.013533
3678	0.019253	0.0062228	0.0029251	0.0063578	0.0022311	0.013054
3677	0.016458	0.012479	0.0043924	0.010015	0.00193	0.013487
3676.1	0.011504	0.015716	0.0038939	0.0091592	0.0056651	0.010789
3675.2	0.0075071	0.011692	0.0088874	0.0094036	0.0089863	0.0067613
3674.2	0.0034269	0.003437	0.015641	0.017098	0.0091779	-7.7856e-06
3673.3	0.0092847	-0.00027232	0.012549	0.017368	0.0087601	0.0034596
3672.4	0.016576	0.0037964	0.0055797	0.011841	0.0053298	0.0091426
3671.4	0.0091429	0.0011495	0.0056221	0.013378	0.012271	0.0067877
3670.5	0.0006386	0.0012399	0.010888	0.0070813	0.014374	0.0090496
3669.6	0.0039	0.0074094	0.013276	0.0024254	0.00979	0.015445
3668.6	0.0026127	0.011158	0.0070661	0.0069899	0.011239	0.014213
3667.7	-0.00059489	0.019575	0.0053575	0.012077	0.013148	0.014029
3666.8	0.0067961	0.022829	0.0075611	0.01141	0.010916	0.01679
3665.8	0.015267	0.018669	0.0062594	0.00489	0.0060652	0.0093959
3664.9	0.014979	0.014234	0.0068615	0.0040868	0.0083156	0.0054793
3664	0.0094588	0.0082084	0.0031928	0.012001	0.0070546	0.0028023
3663	0.0058277	0.0051535	-0.0023259	0.013739	0.0021916	0.0084882
3662.1	0.0078127	0.0036685	0.00057807	0.015579	-0.00038747	0.013268
3661.2	0.013943	0.0022656	0.0069511	0.014984	0.0046408	0.010026
3660.2	0.0088318	0.0068277	0.0088335	0.010939	0.013478	0.0042972
3659.3	0.0020212	0.0097808	0.0056448	0.018176	0.016106	0.0026238
3658.4	0.012138	0.011627	0.0033748	0.017242	0.012587	0.0095591
3657.5	0.016866	0.0096862	-0.00087613	0.011497	0.0067158	0.013583
3656.5	0.01525	0.0097883	-0.0052567	0.006658	0.0046591	0.0052904
3655.6	0.0086425	0.010715	-0.00933	0.0098623	0.0067466	-0.0029773
3654.7	0.008038	0.0084591	-0.0048248	0.016127	0.0088376	0.0023228
3653.7	0.0044961	0.005821	0.0012117	0.016221	0.010496	0.012482
3652.8	0.0074606	0.014188	0.0082567	0.010248	0.012155	0.0124
3651.9	0.014465	0.011671	0.012783	0.012035	0.0097186	0.0027622
3650.9	0.012197	-0.0029416	0.011983	0.018293	0.0054638	0.0031358
3650	0.0078015	-0.001118	0.010375	0.013483	0.011901	0.0090371
3649.1	0.0086972	0.0040374	0.010814	0.0078772	0.01415	0.012691
3648.1	0.012088	0.0025246	0.0083115	0.007204	0.0093382	0.010563
3647.2	0.010552	0.0077159	0.0081201	0.011949	0.0013921	0.0068392
3646.3	0.0011483	0.012396	0.0065168	0.011284	0.0019127	-0.00068059
3645.3	-0.00093901	0.0088902	0.0066242	0.0064054	0.0053203	-0.0073307
3644.4	0.0031537	0.0078399	0.015179	0.0081376	0.0046793	-0.0027048
3643.5	0.0086878	0.0064858	0.016465	0.010669	0.0078471	0.0036143
3642.5	0.01037	0.0075584	0.012713	0.0092885	0.010204	0.0082039
3641.6	0.0088599	0.011646	0.0079136	0.012022	0.017153	0.0094056
3640.7	0.006617	0.0066861	0.0032328	0.01259	0.019538	0.013227
3639.7	0.0089719	0.0050001	0.0041105	0.0082826	0.0189	0.01306
3638.8	0.0090862	0.0092253	0.0073285	0.0044607	0.0167	0.011561
3637.9	0.0045153	0.006216	0.0088064	0.0069422	0.0081657	0.019356
3636.9	0.003229	0.0038458	0.013028	0.011489	0.00093198	0.016911
3636	0.0080805	0.0085829	0.010096	0.015923	0.0063657	0.010075
3635.1	0.004835	0.016719	0.0081196	0.014711	0.0099093	0.0091563
3634.2	0.0035634	0.018201	0.014416	0.0094521	0.0051429	0.0066346
3633.2	0.0097015	0.012109	0.019305	0.01368	-0.00095877	0.0046827
3632.3	0.011635	0.0086017	0.016173	0.012177	0.0052581	0.014185
3631.4	0.0061752	0.0079374	0.014274	0.0095514	0.013237	0.0163
3630.4	0.0079034	0.010257	0.011606	0.014009	0.015722	0.013908
3629.5	0.011533	0.0027309	0.0080979	0.015676	0.0088552	0.019995
3628.6	0.0077431	0.0018664	0.0021045	0.0068492	-0.0010571	0.013959
3627.6	0.0037537	0.0066377	0.0070401	0.0059228	-0.00030023	0.010297
3626.7	0.0072245	0.0064889	0.008681	0.011843	0.005998	0.013329
3625.8	0.016944	0.0062868	0.01365	0.011531	0.012153	0.0065206
3624.8	0.022203	0.0067782	0.011221	0.0094849	0.0094986	0.0088779
3623.9	0.018041	0.0028874	0.010479	0.0082012	0.0055477	0.015848
3623	0.012277	5.9996e-05	0.014732	0.0035899	0.0077051	0.0090291
3622	0.01408	-0.0043059	0.01149	0.0069875	0.0099136	0.0031354
3621.1	0.01477	-0.0015665	0.0038401	0.021893	0.0056161	0.0070264
3620.2	0.010971	0.0022656	0.0024597	0.020869	0.0042984	0.012897
3619.2	0.018547	0.0070672	0.0057123	0.0082444	0.0070549	0.013635
3618.3	0.018881	0.0086892	0.011242	0.0074619	0.0058535	0.0025485
3617.4	0.014913	0.009867	0.012651	0.0086983	0.0097311	-0.0024627
3616.4	0.010571	0.0036356	0.0055463	0.010465	0.018039	0.0034641
3615.5	0.010288	0.0057379	0.0028797	0.021323	0.016852	0.0056265
3614.6	0.010641	0.0086426	0.0090023	0.024609	0.0092421	0.007013
3613.7	0.01104	0.0076148	0.0071883	0.018773	0.0017383	0.0069304
3612.7	0.0050014	0.0059703	0.0074677	0.013391	0.0015461	0.008997
3611.8	0.0043161	0.010567	0.013691	0.01696	0.0060617	0.0079674
3610.9	0.0058779	0.013066	0.018279	0.020157	0.0083863	0.005964
3609.9	0.01214	0.0074374	0.011354	0.0092675	0.0049217	0.0074282
3609	0.019068	0.0011389	0.0033179	0.00015818	0.0096269	0.0095697
3608.1	0.01783	0.0039455	0.0022078	0.0034156	0.01163	0.0037246
3607.1	0.0085266	0.014081	0.0051315	0.0031266	0.0037778	0.0029107
3606.2	-0.0046072	0.015161	0.00085734	0.0026814	0.0067828	0.002978
3605.3	0.0034384	0.01668	-0.0020545	0.012762	0.01171	0.0063914
3604.3	0.0092681	0.010114	0.0017192	0.014612	0.0075089	0.008894
3603.4	0.0072072	0.0043094	0.0054534	0.0092198	0.0086322	0.0032435
3602.5	0.01009	0.0067167	0.0043756	0.0072377	0.008484	0.0020209
3601.5	0.0097612	0.005618	-0.00047793	0.014198	0.0044047	0.0010044
3600.6	0.0034376	0.0041533	0.0042487	0.016562	0.005385	0.0037893
3599.7	0.006702	0.0071809	0.010269	0.01423	0.0017843	0.015085
3598.7	0.016114	0.010414	0.010075	0.017586	0.00087443	0.014719
3597.8	0.011615	0.01012	0.0053706	0.020576	0.01584	0.0084333
3596.9	0.0061339	0.014087	0.011869	0.021361	0.016865	0.0081918
3595.9	0.011937	0.018891	0.016084	0.024374	0.0030862	0.0094208
3595	0.014487	0.013746	0.012402	0.019561	0.0015239	0.0050294
3594.1	0.016703	0.0025346	0.0064411	0.011514	0.0039293	0.0025947
3593.2	0.022401	-0.00079335	0.0079654	0.011567	0.0062739	0.0057469
3592.2	0.017697	0.0014334	0.0053356	0.011385	0.0085387	0.012219
3591.3	0.0076222	0.002329	0.0009915	0.0078046	0.011697	0.019186
3590.4	0.0075774	0.0064354	0.0021734	0.0072904	0.012816	0.023536
3589.4	0.015558	0.0082816	0.0029376	-0.00045255	0.011735	0.025265
3588.5	0.024406	0.007443	0.0045113	-0.001065	0.0089808	0.020607
3587.6	0.021093	0.01099	0.0051675	0.0052579	0.010001	0.01256
3586.6	0.0098478	0.013643	0.0048194	0.0081968	0.0096137	0.0089874
3585.7	0.011426	0.017084	0.010229	0.0033072	0.011355	0.0041268
3584.8	0.014591	0.011594	0.0063324	0.006749	0.017762	0.0028803
3583.8	0.015349	6.0483e-05	-0.00038971	0.011415	0.016201	0.00666
3582.9	0.0081938	0.0048987	0.0072452	0.0098261	0.0082467	0.0086937
3582	0.0007583	0.017493	0.0062777	0.014906	0.0065363	0.013037
3581	-0.0017376	0.014299	0.0040778	0.012818	0.0022727	0.016279
3580.1	-0.00090447	0.0065693	0.0048873	0.0098299	-0.0026509	0.015944
3579.2	-0.0031696	0.0087072	0.01164	0.01454	0.0063654	0.0098884
3578.2	0.0022855	0.011089	0.017545	0.0088833	0.010877	0.0062737
3577.3	0.010594	-0.000107	0.012426	0.0019751	0.012631	0.0044133
3576.4	0.015874	-0.0037355	0.0082694	0.0035399	0.0082849	0.005912
3575.4	0.013527	-0.0022693	0.0049141	0.010211	0.0098306	0.013791
3574.5	0.0084118	0.002075	0.0055365	0.016923	0.017294	0.021969
3573.6	0.01274	0.0054377	0.01465	0.018929	0.01528	0.01442
3572.7	0.019216	0.0089928	0.014472	0.0185	0.015075	0.0076281
3571.7	0.016432	0.015634	0.0011615	0.020209	0.012691	0.0090196
3570.8	0.012836	0.0099573	0.0044495	0.026548	0.014399	0.0060433
3569.9	0.0095515	0.0061797	0.015734	0.025214	0.015321	0.0079059
3568.9	0.0085261	0.0061199	0.016115	0.023964	0.014494	0.016101
3568	0.0076313	0.0022389	0.01963	0.018179	0.013105	0.01362
3567.1	0.0064572	0.0030355	0.023236	0.0098294	0.0096915	0.0057796
3566.1	0.0085015	0.0067749	0.016881	0.010386	0.012616	0.0060695
3565.2	0.010666	0.0076943	0.0049475	0.018508	0.015577	0.0076607
3564.3	0.0076434	0.0060458	0.0019234	0.015682	0.011992	0.0094511
3563.3	0.007492	0.0067429	0.010725	0.010423	0.0080765	0.008994
3562.4	0.0084575	0.008207	0.01716	0.014111	0.002465	0.0097052
3561.5	0.010327	0.0036395	0.01372	0.0069969	0.00077456	0.0089705
3560.5	0.010839	0.0089293	0.0077441	0.00056999	0.002171	0.0074183
3559.6	0.015904	0.018318	0.011801	0.0035277	0.012778	0.0042061
3558.7	0.013897	0.013654	0.011272	0.0063794	0.012261	0.0084305
3557.7	0.0076147	0.0047648	0.00091254	0.0076021	0.0084791	0.014361
3556.8	0.0068187	0.0039262	-0.0014855	0.0081014	0.012509	0.010852
3555.9	0.007677	0.005555	-0.0017593	0.012521	0.013891	0.0074013
3554.9	0.0099932	0.0088599	0.005688	0.016633	0.0055046	0.013465
3554	0.011963	0.018944	0.016334	0.018035	-0.0062825	0.0096267
3553.1	0.010457	0.024973	0.018653	0.015539	-0.0031473	0.013145
3552.2	0.010802	0.013793	0.012488	0.015823	0.0036595	0.013758
3551.2	0.014461	0.0075693	0.011088	0.026099	0.011083	-0.00068823
3550.3	0.014557	0.0052885	0.011573	0.024239	0.017567	-0.00077771
3549.4	0.012227	0.0011129	0.011814	0.016409	0.015182	0.011242
3548.4	0.012745	0.0036197	0.022143	0.011008	0.010346	0.019351
3547.5	0.01518	0.0045602	0.017467	0.015678	0.015266	0.0096798
3546.6	0.012846	-0.0010072	0.012977	0.026482	0.018253	0.0033328
3545.6	0.010327	0.0040367	0.01364	0.020759	0.012624	0.01473
3544.7	0.0091746	0.010926	0.012435	0.017034	0.012661	0.017654
3543.8	0.0051258	0.011408	0.0073646	0.020169	0.008453	0.012208
3542.8	0.0093939	0.0084404	-0.0050202	0.014423	0.0023804	0.0089935
3541.9	0.011013	0.0091094	-0.0033523	0.013243	0.0088409	0.0098308
3541	0.01974	0.01491	0.0069889	0.01347	0.021837	0.019617
3540	0.025994	0.020831	0.0091342	0.014924	0.019666	0.02442
3539.1	0.012525	0.014031	0.0099178	0.015731	0.0090942	0.014756
3538.2	0.009192	0.0039174	0.0073471	0.018166	0.0099969	0.01733
3537.2	0.011264	0.0060415	-0.004292	0.022756	0.020556	0.021332
3536.3	0.010816	0.014493	-0.0014926	0.018413	0.019474	0.017932
3535.4	0.011369	0.019346	0.0095282	0.015682	0.014225	0.018632
3534.4	0.0068872	0.015155	0.0071702	0.021588	0.020237	0.015811
3533.5	0.012221	0.013519	0.012794	0.015617	0.012619	0.0081262
3532.6	0.022125	0.0098788	0.019755	0.011547	0.010584	0.002715
3531.7	0.02001	0.0025713	0.023353	0.015151	0.013581	0.01043
3530.7	0.011636	0.0056296	0.026975	0.013415	0.015105	0.016484
3529.8	0.010579	0.0016092	0.022067	0.021938	0.012137	0.0079161
3528.9	0.013724	0.0023856	0.01051	0.021869	0.0026815	0.0047485
3527.9	0.015476	0.012547	0.011473	0.014367	0.0060959	0.015136
3527	0.019017	0.021114	0.017549	0.020059	0.010819	0.018874
3526.1	0.016104	0.025207	0.016361	0.018959	0.0070884	0.008553
3525.1	0.013516	0.016788	0.015832	0.01911	0.0072035	0.016385
3524.2	0.016473	0.004779	0.011137	0.023156	0.012396	0.022603
3523.3	0.022805	0.0074089	0.0024432	0.0119	0.016142	0.012155
3522.3	0.017311	0.0053765	0.010291	0.00843	0.014177	0.011133
3521.4	0.01301	0.0016544	0.019775	0.0043621	0.02053	0.007808
3520.5	0.020357	0.01297	0.013022	0.0059977	0.025036	0.011707
3519.5	0.023347	0.024359	0.011418	0.017854	0.019697	0.025267
3518.6	0.019098	0.016862	0.013757	0.019609	0.016269	0.026077
3517.7	0.0099018	0.017246	0.013456	0.016309	0.0094458	0.0095756
3516.7	0.003173	0.024784	0.010487	0.013417	0.0041268	0.00039944
3515.8	0.0048603	0.022433	0.014001	0.015683	0.011111	0.011446
3514.9	0.015863	0.018196	0.018747	0.022113	0.010917	0.019057
3513.9	0.012468	0.014271	0.01705	0.018288	0.0044391	0.013828
3513	0.010062	0.0096771	0.0067151	0.01219	0.0031521	0.012413
3512.1	0.024289	0.0065747	0.0015239	0.0092821	0.0099955	0.015677
3511.2	0.027587	0.010581	0.0094512	0.0081183	0.019161	0.014278
3510.2	0.021414	0.015476	0.01931	0.017189	0.028987	0.012585
3509.3	0.018073	0.011298	0.024778	0.033254	0.031667	0.016131
3508.4	0.016321	0.015072	0.017283	0.03204	0.029127	0.024157
3507.4	0.015775	0.012521	0.0091207	0.02631	0.017169	0.03055
3506.5	0.022479	0.0089638	0.013002	0.018314	0.010608	0.026561
3505.6	0.026491	0.019545	0.017489	0.013201	0.013798	0.015522
3504.6	0.017435	0.02389	0.018998	0.012065	0.01318	0.017232
3503.7	0.0083322	0.017435	0.020702	0.017451	0.013273	0.020356
3502.8	0.0046441	0.013289	0.019127	0.019304	0.020796	0.017406
3501.8	0.0060672	0.022354	0.016311	0.014945	0.024727	0.021269
3500.9	0.013667	0.022781	0.017202	0.013955	0.022357	0.015276
3500	0.016786	0.013751	0.020073	0.025835	0.02191	0.0044367
3499	0.021336	0.011643	0.017959	0.030309	0.018449	0.0076024
3498.1	0.023151	0.012488	0.017297	0.0126	0.024464	0.016034
3497.2	0.016372	0.020751	0.023364	0.014478	0.028302	0.016846
3496.2	0.016071	0.02736	0.02975	0.026458	0.020683	0.018989
3495.3	0.02388	0.027551	0.021355	0.025077	0.010124	0.019559
3494.4	0.015166	0.029744	0.011209	0.020283	0.011926	0.027718
3493.4	0.012667	0.023695	0.014924	0.017838	0.010309	0.027729
3492.5	0.021164	0.017608	0.021776	0.019112	0.01115	0.017082
3491.6	0.022864	0.01985	0.022226	0.024971	0.024915	0.016995
3490.7	0.020827	0.0193	0.021732	0.024747	0.024298	0.02283
3489.7	0.026489	0.016706	0.015944	0.020169	0.013035	0.028122
3488.8	0.034581	0.015398	0.014143	0.018946	0.011285	0.030058
3487.9	0.040107	0.01914	0.02431	0.018441	0.01167	0.025268
3486.9	0.043678	0.024534	0.023744	0.016295	0.012291	0.020014
3486	0.03889	0.02493	0.023495	0.017206	0.016899	0.021475
3485.1	0.025605	0.029684	0.032134	0.017696	0.024929	0.025578
3484.1	0.018495	0.0335	0.027402	0.014246	0.023061	0.020451
3483.2	0.020973	0.018499	0.02276	0.013524	0.016111	0.026823
3482.3	0.023845	0.015087	0.024902	0.014739	0.010597	0.023586
3481.3	0.027209	0.019523	0.030034	0.015353	0.018638	0.017987
3480.4	0.024241	0.020684	0.028472	0.02297	0.024465	0.02182
3479.5	0.0192	0.02304	0.034844	0.028071	0.018437	0.027762
3478.5	0.023614	0.020529	0.035327	0.027304	0.014538	0.027771
3477.6	0.030453	0.018657	0.027454	0.030092	0.020413	0.024483
3476.7	0.02338	0.020811	0.02024	0.029136	0.025317	0.017915
3475.7	0.01639	0.015177	0.012308	0.025239	0.032213	0.01877
3474.8	0.017905	0.0010125	0.0081464	0.023296	0.029628	0.022178
3473.9	0.020213	0.0032621	0.021304	0.029027	0.021372	0.02274
3472.9	0.014742	0.013593	0.023233	0.022506	0.01711	0.027034
3472	0.0092507	0.018518	0.023363	0.0181	0.016165	0.023437
3471.1	0.015662	0.0251	0.023471	0.022068	0.018078	0.014645
3470.2	0.024832	0.02499	0.018942	0.014538	0.018654	0.020342
3469.2	0.031229	0.017912	0.01942	0.012679	0.021151	0.02257
3468.3	0.025105	0.020266	0.01773	0.024174	0.021469	0.01911
3467.4	0.014659	0.022774	0.019478	0.026414	0.017367	0.019601
3466.4	0.011082	0.019207	0.019187	0.015739	0.011478	0.021704
3465.5	0.0076171	0.007115	0.019704	0.0060278	0.0063563	0.026176
3464.6	0.0062516	0.0068266	0.019638	0.0099668	0.018622	0.022266
3463.6	0.0085236	0.021717	0.016757	0.020809	0.025802	0.017139
3462.7	0.011638	0.031937	0.0078778	0.03264	0.013938	0.012449
3461.8	0.014708	0.02348	0.0076446	0.027032	0.0090828	0.015159
3460.8	0.015729	0.02064	0.014553	0.016715	0.012276	0.015087
3459.9	0.017917	0.024303	0.016507	0.0088411	0.015235	0.01978
3459	0.019276	0.017111	0.01746	0.0059556	0.016531	0.018321
3458	0.017615	0.014227	0.023152	0.0058897	0.016984	0.009598
3457.1	0.02581	0.015705	0.022788	0.0095867	0.019199	0.013766
3456.2	0.031912	0.015874	0.020403	0.0092534	0.020387	0.012122
3455.2	0.02921	0.012927	0.016277	0.0083823	0.014069	0.0053853
3454.3	0.019154	0.0065069	0.016195	0.017847	0.00918	0.012199
3453.4	0.0060114	0.011871	0.012985	0.02105	0.007326	0.02314
3452.4	0.0031575	0.018007	0.0055472	0.020645	0.0066091	0.028624
3451.5	0.0069164	0.018279	0.00082076	0.023283	0.014519	0.021148
3450.6	0.010044	0.01769	0.0027485	0.022869	0.017663	0.0091491
3449.7	0.01734	0.011414	0.01085	0.022434	0.01283	0.0069398
3448.7	0.018923	0.013351	0.013562	0.019335	0.0057734	0.013666
3447.8	0.022416	0.014691	0.019908	0.016133	0.0071077	0.012406
3446.9	0.027535	0.009538	0.016997	0.017162	0.014959	0.007573
3445.9	0.029143	0.01025	0.011182	0.020507	0.019558	0.012867
3445	0.022709	0.017858	0.0067941	0.01935	0.020242	0.011391
3444.1	0.011443	0.013617	0.0049122	0.0042615	0.020667	0.0037714
3443.1	0.0052603	0.0058582	0.0076085	0.0054215	0.017787	0.0052969
3442.2	0.0034888	0.019433	0.0079547	0.0206	0.0084121	0.0052383
3441.3	0.0068018	0.018709	0.0092331	0.019907	0.0021347	0.0063933
3440.3	0.015725	0.0062489	0.012154	0.011923	0.0064996	0.017905
3439.4	0.01258	0.0043653	0.0049895	0.0086602	0.011368	0.014042
3438.5	0.0089448	0.002657	0.0027554	0.0087373	0.010116	0.0026524
3437.5	0.014055	0.0020834	0.014603	0.014157	0.014032	0.003672
3436.6	0.0060756	0.003298	0.022291	0.017244	0.017049	0.0096807
3435.7	0.0017279	0.0033554	0.018877	0.013421	0.017071	0.017415
3434.7	0.01624	0.0036198	0.014394	0.010739	0.01199	0.019873
3433.8	0.022503	0.010405	0.015781	0.010429	0.014132	0.012635
3432.9	0.013609	0.014082	0.011109	0.014179	0.010392	0.010226
3431.9	0.011842	0.019041	0.0090089	0.019737	0.0027147	0.0064716
3431	0.017347	0.02121	0.010688	0.020054	0.0051319	0.010375
3430.1	0.022676	0.011132	0.0123	0.015783	0.0090508	0.012662
3429.2	0.017013	0.0043843	0.011053	0.016839	0.0069322	0.012146
3428.2	0.013665	0.013542	0.01542	0.028434	0.0027332	0.019916
3427.3	0.017196	0.01836	0.01765	0.028373	0.010121	0.016317
3426.4	0.021694	0.013552	0.0032586	0.016999	0.015363	0.0069973
3425.4	0.013661	0.0043762	-0.010101	0.0099221	0.0071076	0.0050482
3424.5	0.0045121	0.0059321	-9.5894e-05	0.012659	0.0059134	0.0091245
3423.6	0.0084518	0.0095584	0.0096291	0.017051	0.013797	0.0078792
3422.6	0.01399	0.0028873	0.0074603	0.020435	0.018361	0.00083704
3421.7	0.0087825	0.0033839	0.008449	0.022299	0.02215	-0.0015194
3420.8	0.0026129	0.010526	0.01166	0.017015	0.017547	0.0070786
3419.8	-0.0011248	0.0083556	0.0094688	0.0033355	0.014812	0.010409
3418.9	-0.0036411	0.004674	0.0014988	-0.0037962	0.01601	0.010023
3418	-0.0029007	0.010787	-0.0041235	0.0027842	0.016294	0.010614
3417	0.004669	0.011647	-0.0012856	0.010594	0.0039548	0.015989
3416.1	0.011649	0.0086334	0.0028635	0.018142	-0.0015667	0.016584
3415.2	0.014834	0.010038	0.0044922	0.01526	0.0074915	0.014281
3414.2	0.0077907	0.01161	0.010525	0.0081299	0.011078	0.01058
3413.3	-0.00045709	0.018275	0.016567	0.015852	0.013864	0.0090378
3412.4	0.0029676	0.016573	0.014118	0.018552	0.01444	0.010179
3411.4	0.013902	0.010985	0.013143	0.017053	0.010053	0.015827
3410.5	0.018846	0.0096276	0.017767	0.017599	0.0074164	0.020614
3409.6	0.020331	0.0091736	0.01331	0.011819	0.0069706	0.018058
3408.7	0.0192	0.00637	0.0011519	0.01341	0.010074	0.011918
3407.7	0.0071465	0.0035712	-0.0045943	0.015239	0.010826	0.010822
3406.8	0.0039657	0.0071487	-0.0081557	0.015542	0.011704	0.012188
3405.9	0.0089822	0.013268	-0.004534	0.017777	0.012208	0.0051787
3404.9	0.013948	0.011358	-0.00030685	0.01567	0.0069894	0.0036247
3404	0.01747	0.0085633	-0.00021004	0.011875	0.0042685	0.0062204
3403.1	0.011993	0.0056551	0.0026164	0.013541	0.006001	0.010291
3402.1	0.001422	-0.0037122	-0.00047481	0.017805	0.013407	0.010411
3401.2	-0.00077605	0.00317	-2.2078e-05	0.015475	0.022009	0.01173
3400.3	0.0071314	0.018376	0.013462	0.017782	0.0155	0.017757
3399.3	0.012839	0.018706	0.013823	0.021984	0.0037821	0.012715
3398.4	0.015989	0.01703	0.0060636	0.017874	0.0075718	0.0079842
3397.5	0.012269	0.014697	0.0079888	0.013481	0.014046	0.0079192
3396.5	0.0084778	0.0042296	0.0086603	0.014286	0.012914	0.0077
3395.6	0.0062384	0.0030377	0.013635	0.012843	0.0069281	0.011769
3394.7	0.010247	0.013553	0.01465	0.005424	0.004521	0.0094711
3393.7	0.015874	0.020644	0.0057914	0.0030181	0.0030831	0.0086755
3392.8	0.016484	0.013226	-0.0035508	0.0058279	2.185e-05	0.012675
3391.9	0.021426	0.00336	0.0026609	0.016087	0.0050827	0.010385
3390.9	0.014467	0.0095251	0.0074455	0.016593	0.010166	0.0037767
3390	0.0032656	0.019819	0.0025751	0.010023	0.009669	0.0024065
3389.1	0.0037118	0.015424	0.0047217	0.0065414	0.006812	0.0058081
3388.2	0.014126	0.0034673	0.0056981	0.0054789	0.0040503	0.010157
3387.2	0.020745	-0.0009227	0.0048224	0.012735	0.0099067	0.0085622
3386.3	0.016754	0.0050655	0.0060469	0.021257	0.0071945	0.012813
3385.4	0.011736	0.015022	0.0092201	0.017636	0.0058976	0.014432
3384.4	0.0087046	0.010369	0.013773	0.011384	0.011798	0.0084583
3383.5	0.01172	0.0019249	0.009924	0.012379	0.015144	0.0090651
3382.6	0.013451	0.0034515	0.0027575	0.015698	0.014725	0.010595
3381.6	0.010453	0.010476	0.0072043	0.018833	0.0085756	0.0026451
3380.7	0.009276	0.014608	0.015496	0.019004	0.0050287	-5.1265e-05
3379.8	0.014697	0.0071811	0.014888	0.017518	0.0023961	0.00076934
3378.8	0.013785	0.00089932	0.0075313	0.020296	0.0049088	0.002414
3377.9	0.0069547	0.0024768	0.0037583	0.017667	0.012325	0.0040185
3377	0.010432	0.0036078	0.0052076	0.011988	0.010809	0.0097373
3376	0.0074345	0.0073956	0.0040127	0.0070306	0.0073552	0.012539
3375.1	0.0043524	0.01362	0.0056557	0.0069073	0.0093011	0.0074299
3374.2	0.010276	0.011543	0.010664	0.010511	0.011197	0.0021629
3373.2	0.01425	0.0069698	0.0089556	0.010421	0.0089394	0.0066194
3372.3	0.018378	0.0049053	0.0069747	0.017508	0.0026592	0.013326
3371.4	0.022665	0.0050052	0.012951	0.018304	0.0015472	0.013002
3370.4	0.019249	0.0096407	0.0086474	0.0091504	0.0017079	0.011724
3369.5	0.01463	0.017133	0.0044091	0.0084208	0.0037599	0.010976
3368.6	0.011309	0.013727	0.0079098	0.012612	0.00586	0.017859
3367.6	0.0037555	0.0045975	-0.001387	0.019219	0.0033689	0.02147
3366.7	-0.0045194	0.0054525	-0.0045978	0.017098	0.0020694	0.014209
3365.8	-0.0059335	0.011648	0.0095455	0.0043708	0.0012152	0.0059229
3364.9	0.0045729	0.012778	0.013277	0.00075346	0.0055747	0.011544
3363.9	0.0059778	0.0098204	0.0053135	0.0014697	0.0090552	0.01819
3363	0.00024704	0.0075231	0.0069165	0.0051588	0.013114	0.013782
3362.1	0.0022652	0.0063608	0.017086	0.015116	0.016982	0.0073838
3361.1	0.0052713	0.0014615	0.01732	0.01697	0.0086596	0.0072658
3360.2	0.011266	0.0011543	0.0072809	0.013519	0.0020387	0.010028
3359.3	0.01755	0.0044533	0.004855	0.0058961	0.0054775	0.012264
3358.3	0.021365	-0.0015752	0.010446	0.0024578	0.0075613	0.010639
3357.4	0.024595	0.0020571	0.008995	0.0020111	0.0071173	0.0060411
3356.5	0.029877	0.010642	0.0056839	0.0041357	0.0025435	0.009493
3355.5	0.030195	0.0068042	0.0050882	0.0095318	0.0055859	0.013252
3354.6	0.014614	0.0035432	0.0015808	0.013146	0.012383	0.0089163
3353.7	0.004801	0.0045984	-1.5768e-05	0.01573	0.010125	0.0054747
3352.7	0.0057991	0.0026231	0.0053569	0.018227	0.010326	-0.0031703
3351.8	0.0069968	0.0011505	0.0096274	0.019902	0.018127	-0.0093991
3350.9	0.0049651	0.005624	0.0090847	0.014249	0.020253	-0.0020221
3349.9	0.0090487	0.014668	0.0048641	0.010238	0.016957	0.007116
3349	0.014657	0.021882	0.0052127	0.015672	0.014107	0.0090373
3348.1	0.010211	0.015702	0.01057	0.020727	0.017648	0.010472
3347.1	0.0095368	0.0074784	0.011833	0.018718	0.015975	0.010514
3346.2	0.01633	0.0024479	0.0093321	0.014305	0.0076868	0.0048273
3345.3	0.017729	-0.00087026	0.0025967	0.015632	0.0066597	0.0065135
3344.4	0.014264	0.0028636	0.0050537	0.010827	0.013041	0.012719
3343.4	0.01005	0.0038777	0.0087638	0.0070909	0.015826	0.0089405
3342.5	0.0078418	0.0043719	0.006333	0.013216	0.012242	0.0078146
3341.6	0.0074875	0.0068915	0.010365	0.018218	0.011151	0.0099949
3340.6	0.0073266	0.0087611	0.012473	0.019975	0.009464	0.013021
3339.7	0.0057595	0.011191	0.0096702	0.017962	0.0069085	0.015468
3338.8	0.009443	0.0094931	0.0081638	0.013723	0.0077497	0.013308
3337.8	0.014443	-0.0020772	0.010516	0.014071	0.009266	0.0081258
3336.9	0.0069807	-0.00041097	0.011598	0.014671	0.0076905	0.0097215
3336	-0.0012458	0.013248	0.0089854	0.012168	0.0052004	0.016596
3335	0.0020504	0.018242	0.0013497	0.0065238	0.0079075	0.015518
3334.1	0.0069589	0.016314	0.0028779	0.0094374	0.010634	0.011723
3333.2	0.0036615	0.012529	0.0074554	0.015287	0.0019745	0.0063636
3332.2	0.0043031	0.0034787	0.0023874	0.012335	-0.007267	0.0039893
3331.3	0.0074099	0.00074007	0.0036838	0.0090208	-0.0033695	0.0055163
3330.4	0.0069596	0.0087442	0.0078196	0.010082	0.0094698	0.011161
3329.4	0.012356	0.016396	0.0044601	0.011	0.013411	0.01314
3328.5	0.014802	0.012841	0.0072926	0.014628	0.010859	0.0088577
3327.6	0.011265	0.0062649	0.011347	0.0096077	0.014534	0.0071497
3326.6	0.014896	0.011513	0.0014182	0.002321	0.0094154	0.0099623
3325.7	0.022147	0.018346	-0.0018386	0.0056855	0.0042849	0.0092899
3324.8	0.018747	0.011021	0.011315	0.0069328	0.0091319	0.012791
3323.9	0.010609	0.0083923	0.024285	0.0086179	0.010034	0.016112
3322.9	0.014799	0.010244	0.02319	0.012131	0.0092809	0.014101
3322	0.025278	0.002599	0.014545	0.0092414	0.012236	0.016239
3321.1	0.02131	-0.00083739	0.0077838	0.014639	0.011108	0.022323
3320.1	0.012008	0.0032163	0.0056365	0.020114	0.0065536	0.021051
3319.2	0.010127	0.0063186	0.00058957	0.016856	0.0074993	0.0084312
3318.3	0.0068168	0.0089297	-0.0022118	0.017762	0.011017	0.0037833
3317.3	0.007415	0.017303	0.0042986	0.024842	0.014551	0.0052854
3316.4	0.013266	0.020146	0.0061384	0.024664	0.014403	-0.0011674
3315.5	0.014782	0.012878	0.0059396	0.012671	0.0066259	-0.0041189
3314.5	0.010092	0.0027028	0.0090146	0.0074397	0.0037283	0.00060729
3313.6	0.0047229	-0.0046211	0.011022	0.010398	0.0060379	0.0019043
3312.7	0.00013615	-0.00065519	0.0054392	0.0081068	0.0061477	0.00033591
3311.7	-7.4504e-05	0.0058311	0.00042096	0.006336	0.0055556	6.243e-05
3310.8	0.006892	0.0062899	0.0020378	0.0062804	0.003959	0.0051128
3309.9	0.0092881	0.009332	0.0031547	0.0064165	0.0052086	0.0090174
3308.9	0.0034924	0.01249	0.0095028	0.013995	0.0081978	0.0036038
3308	0.0026054	0.011264	0.011903	0.018209	0.01252	0.0093612
3307.1	0.014482	0.0074365	0.0060067	0.014198	0.015062	0.021623
3306.1	0.018819	0.0072361	0.0099262	0.013184	0.010974	0.018649
3305.2	0.013191	0.0093029	0.010604	0.013537	0.0083221	0.010112
3304.3	0.011392	0.0097666	0.0077674	0.0096598	0.0093009	0.010013
3303.4	0.0076151	0.0088555	0.0067799	0.011227	0.013243	0.012965
3302.4	0.0057732	0.0077877	0.0055373	0.015411	0.01479	0.008329
3301.5	0.010132	0.011388	0.0088856	0.01357	0.011725	0.0027216
3300.6	0.012784	0.015473	0.014998	0.010507	0.009841	0.0041845
3299.6	0.0097988	0.012329	0.014137	0.010451	0.0077827	0.015133
3298.7	0.0039501	0.0084289	0.0073154	0.016731	0.0018073	0.019599
3297.8	0.0011562	0.013387	0.0037038	0.023617	-0.0013757	0.0080166
3296.8	0.0076433	0.016723	0.00052104	0.017693	0.0043581	0.0048924
3295.9	0.013636	0.016068	0.0023485	0.013673	0.0090907	0.012364
3295	0.011291	0.0096184	0.0050696	0.016704	0.0072305	0.011634
3294	0.0070326	0.0041468	0.003884	0.014732	0.0046565	0.0067368
3293.1	0.008331	0.0095754	0.011994	0.0091616	0.0011991	0.002629
3292.2	0.0082046	0.013846	0.01427	0.0087429	-1.4876e-05	0.0089711
3291.2	0.0041056	0.0096819	0.0092617	0.013007	0.0072908	0.018872
3290.3	0.0072749	0.0047059	0.0062506	0.016913	0.014758	0.014352
3289.4	0.014288	0.0068462	0.0085506	0.019308	0.015312	0.0064045
3288.4	0.017656	0.0084402	0.010845	0.016497	0.016508	0.0065871
3287.5	0.01359	0.00081329	0.0098938	0.010708	0.018175	0.0079931
3286.6	0.0077875	0.0023789	0.014702	0.010277	0.012708	0.0049191
3285.6	0.010356	0.0099979	0.012527	0.012585	0.007062	0.0042446
3284.7	0.01297	0.0042558	0.0055786	0.013811	0.005916	0.01281
3283.8	0.0085183	-0.0032072	0.0051479	0.012558	0.0077813	0.019115
3282.9	0.0068991	-0.0022801	-0.00011385	0.012035	0.0077201	0.015488
3281.9	0.0093162	0.0029787	-0.0028313	0.01218	0.0082891	0.01391
3281	0.011024	0.010019	0.0077115	0.014601	0.0070819	0.013062
3280.1	0.010162	0.011919	0.014965	0.019899	0.0064269	0.011262
3279.1	0.0080265	0.012083	0.0081485	0.017823	0.0052057	0.008688
3278.2	0.0094648	0.0133	0.0066465	0.0095275	0.0012098	0.0038841
3277.3	0.014071	0.012713	0.0079892	0.0060482	0.0079252	0.0019533
3276.3	0.012554	0.0093778	0.0058059	0.012384	0.014469	0.0035959
3275.4	0.0041281	0.0091709	0.01283	0.016757	0.010185	0.0059663
3274.5	0.0018351	0.010503	0.018032	0.015333	0.0069603	0.010663
3273.5	0.0033437	0.0058317	0.014199	0.012974	0.011581	0.015489
3272.6	0.0065834	-0.0020231	0.0089453	0.0099899	0.015951	0.015218
3271.7	0.010992	-0.0030713	0.0038247	0.011028	0.011419	0.013623
3270.7	0.010586	-0.00065782	0.0025323	0.0092102	0.0064223	0.012992
3269.8	0.0084581	0.0021898	0.0082047	0.0076466	0.0062588	0.0092117
3268.9	0.0063089	0.0057194	0.01596	0.012742	0.0062431	0.0033856
3267.9	0.0050845	0.012242	0.015725	0.011825	0.0076083	0.0033353
3267	0.0073927	0.019211	0.011613	0.011196	0.013527	0.0063343
3266.1	0.0062877	0.016285	0.015515	0.015449	0.01211	-0.00038558
3265.1	0.003533	0.0093542	0.014779	0.013714	0.010614	-0.0036339
3264.2	0.002812	0.0041851	0.0020443	0.010532	0.010433	0.0077839
3263.3	0.0047367	-0.0021884	-0.0033468	0.017445	0.0048648	0.013343
3262.4	0.009951	0.0017343	0.0034626	0.01965	0.0063855	0.012269
3261.4	0.011774	0.014278	0.016269	0.011681	0.010657	0.01967
3260.5	0.0099593	0.014825	0.015314	0.0080025	0.012415	0.020931
3259.6	0.0099391	0.0082003	0.0017865	0.0060431	0.011191	0.020291
3258.6	0.011577	0.0091172	0.0029866	0.008102	0.00829	0.022993
3257.7	0.0080365	0.0075501	0.008826	0.011041	0.0092037	0.012855
3256.8	0.0060286	0.0054322	0.0073395	0.010158	0.011925	0.0023192
3255.8	0.013553	0.0119	0.0076521	0.013438	0.01029	0.0089463
3254.9	0.016014	0.014457	0.013309	0.017693	0.0060635	0.016416
3254	0.013506	0.012134	0.012666	0.019374	0.0058809	0.0097792
3253	0.012148	0.007776	0.0049488	0.016019	0.011255	-0.0016687
3252.1	0.010081	-0.0012275	-2.3189e-05	0.010939	0.016757	-0.0044956
3251.2	0.0048824	-0.0028861	0.0057676	0.010706	0.018246	0.0031231
3250.2	-0.0027142	0.0049424	0.0097435	0.012203	0.014871	0.010358
3249.3	0.0015859	0.010838	0.0063047	0.0090959	0.0096703	0.016018
3248.4	0.011628	0.0095192	0.0076513	0.0061444	0.0066421	0.020655
3247.4	0.0088402	0.0068498	0.009085	0.008186	0.006286	0.016318
3246.5	0.0073282	0.0062517	0.0088852	0.0069844	0.0099208	0.0062138
3245.6	0.01276	0.0052025	0.011064	0.0024724	0.012106	0.003033
3244.6	0.0092559	0.0050683	0.012536	0.0032866	0.008631	0.0051502
3243.7	0.0053141	0.0051292	0.0087261	0.008976	0.0056038	0.006138
3242.8	0.0071726	0.00068246	0.0056089	0.012463	0.0063692	0.0095062
3241.9	0.0078341	-0.001788	0.0029263	0.014936	0.0061992	0.0081456
3240.9	0.0055538	0.0022355	0.0010471	0.016258	0.0041717	0.0051868
3240	0.0047077	0.0061598	0.0056668	0.014621	0.010657	0.011217
3239.1	0.006677	0.011923	0.010407	0.0087242	0.015128	0.013642
3238.1	0.0099982	0.014082	0.0091196	0.005468	0.0071326	0.010606
3237.2	0.011532	0.0069575	0.0038636	0.0076165	0.0057625	0.0079732
3236.3	0.0096851	0.0052138	0.0038506	0.0066228	0.0079489	0.0062816
3235.3	0.0089531	0.012613	0.01002	0.0083361	0.0072972	0.010094
3234.4	0.00781	0.011864	0.014175	0.013006	0.0047539	0.0091267
3233.5	0.0028517	0.010054	0.012732	0.014399	0.00078143	0.0058127
3232.5	0.0051331	0.012957	0.01085	0.011879	0.0047015	0.011645
3231.6	0.0083973	0.015917	0.0081224	0.0088137	0.0059073	0.017974
3230.7	0.0061515	0.014198	0.0038491	0.01421	0.0030084	0.016521
3229.7	0.0090605	0.012146	0.0051311	0.013106	0.0027555	0.012955
3228.8	0.0093325	0.01033	0.0095869	0.0091916	0.0024304	0.012711
3227.9	0.0071683	0.0055743	0.01443	0.015469	0.0023251	0.012713
3226.9	0.0095342	0.0044032	0.013045	0.019112	0.0081285	0.012998
3226	0.014687	0.0054933	0.0058456	0.015841	0.013848	0.013075
3225.1	0.012541	0.0080936	0.005082	0.013835	0.011079	0.0091664
3224.1	0.0058084	0.0073828	0.010427	0.020029	0.010585	0.0058954
3223.2	0.0096828	0.0058029	0.012814	0.020715	0.012089	0.0012388
3222.3	0.013678	0.0057756	0.010543	0.012934	0.011251	-0.0035336
3221.4	0.0086286	0.0040093	0.008794	0.011501	0.010829	0.00014599
3220.4	0.0042288	0.002636	0.0057878	0.011408	0.0078438	0.010315
3219.5	0.0044386	0.0018329	0.0043949	0.014178	0.0042189	0.019164
3218.6	0.010757	0.0047314	0.0085107	0.023589	0.0049896	0.016577
3217.6	0.015469	0.0091144	0.010945	0.019982	0.010016	0.010578
3216.7	0.014321	0.011331	0.010656	0.013776	0.011091	0.0095957
3215.8	0.014942	0.0069035	0.014115	0.016176	0.0074974	0.011472
3214.8	0.014595	0.0036	0.013173	0.015312	0.005858	0.011837
3213.9	0.0086052	0.011329	0.0032097	0.013323	0.003319	0.0078905
3213	0.0065723	0.013647	-0.0027299	0.014656	0.0007237	0.006404
3212	0.011484	0.0083522	0.0047073	0.016375	0.0047571	0.0057334
3211.1	0.013013	0.0069183	0.014649	0.0090039	0.0073038	0.0032292
3210.2	0.013966	0.0048772	0.014	0.003427	0.005282	0.0053329
3209.2	0.014018	0.0012908	0.011795	0.0074806	0.0055411	0.013614
3208.3	0.0096059	0.0014105	0.011885	0.008945	0.011612	0.017847
3207.4	0.0069746	0.0014396	0.0089175	0.0047604	0.015481	0.013056
3206.4	0.006627	0.0032663	0.013786	0.00098079	0.013101	0.0079271
3205.5	0.0090149	0.0075448	0.020061	0.0038502	0.0067451	0.0051772
3204.6	0.011237	0.011113	0.017402	0.01253	0.0056733	0.005762
3203.6	0.013125	0.010174	0.01383	0.017725	0.007919	0.0079306
3202.7	0.017199	0.0092244	0.0081461	0.019332	0.0031601	0.008014
3201.8	0.020465	0.011348	0.0035546	0.018269	0.0028223	0.010817
3200.9	0.019611	0.0084907	0.0060246	0.013171	0.0054378	0.013277
3199.9	0.013995	0.0053929	0.0088193	0.0086914	0.0098109	0.014911
3199	0.0094619	0.0078303	0.0079988	0.009252	0.016505	0.019447
3198.1	0.0074784	0.011382	0.0065301	0.016656	0.018553	0.017023
3197.1	0.010183	0.01159	0.011264	0.023263	0.014871	0.012208
3196.2	0.015855	0.01037	0.0142	0.020894	0.010862	0.0077521
3195.3	0.017167	0.010021	0.011241	0.016005	0.010781	0.0047071
3194.3	0.011523	0.0096764	0.01063	0.016736	0.010302	0.011717
3193.4	0.0051445	0.010058	0.011722	0.016457	0.007425	0.016489
3192.5	0.0047443	0.012889	0.010366	0.011792	0.0081146	0.016217
3191.5	0.0078066	0.016352	0.0065793	0.011678	0.012122	0.015797
3190.6	0.010997	0.013131	0.0054169	0.016703	0.0077357	0.0074088
3189.7	0.014426	0.0082358	0.0062444	0.019099	0.0014222	0.0036198
3188.7	0.015185	0.0073764	0.0066342	0.016079	0.0035056	0.012105
3187.8	0.012736	0.0091429	0.010493	0.012548	0.0038613	0.013964
3186.9	0.01167	0.012431	0.011145	0.013545	0.0041441	0.0096219
3185.9	0.013303	0.012025	0.010341	0.016726	0.0094018	0.0070741
3185	0.0098023	0.012289	0.012792	0.013793	0.010155	0.0078697
3184.1	0.0068839	0.01337	0.0073063	0.0096865	0.003215	0.01137
3183.1	0.0096742	0.0083845	0.0030304	0.0085197	-0.0029936	0.0088348
3182.2	0.0099553	0.0016454	0.0070067	0.0081931	-0.0016762	0.0050823
3181.3	0.0074173	-0.0042862	0.010876	0.01004	0.0029426	0.0088423
3180.4	0.0091836	-0.0034329	0.010198	0.0092927	0.0076829	0.012724
3179.4	0.013341	0.0060013	0.0077455	0.011584	0.013265	0.015763
3178.5	0.011207	0.010237	0.013128	0.014776	0.014078	0.015912
3177.6	0.0063237	0.0089081	0.020485	0.013016	0.011839	0.013235
3176.6	0.009097	0.0086789	0.020656	0.014157	0.011833	0.010413
3175.7	0.011668	0.012644	0.014917	0.016524	0.011314	0.0066505
3174.8	0.0097172	0.017318	0.0097005	0.012651	0.0097923	0.0042634
3173.8	0.010923	0.015634	0.0095483	0.0088211	0.0095885	0.001745
3172.9	0.013395	0.0081273	0.012103	0.0093074	0.00937	0.0033938
3172	0.012344	0.0045209	0.0079691	0.0088926	0.0070472	0.010897
3171	0.0096909	0.0061581	0.0070862	0.011138	0.0064647	0.016016
3170.1	0.007237	0.0089352	0.010446	0.015103	0.0096147	0.011339
3169.2	0.010195	0.011768	0.0099761	0.013856	0.0094801	0.004337
3168.2	0.01354	0.010412	0.010716	0.010594	0.0053917	0.0054145
3167.3	0.011425	0.0090891	0.0095107	0.012621	0.0063815	0.010442
3166.4	0.010024	0.0078754	0.0066997	0.010705	0.010314	0.012537
3165.4	0.011263	0.0031573	0.0049915	0.0062102	0.00734	0.0080336
3164.5	0.010177	0.0073879	0.0060858	0.00688	0.0048837	0.0077997
3163.6	0.010763	0.013198	0.010397	0.004569	0.0026073	0.011606
3162.6	0.01161	0.012658	0.01316	0.0052413	-0.00090714	0.0088726
3161.7	0.0082359	0.013398	0.015938	0.011935	0.0019342	0.0062025
3160.8	0.0073702	0.01323	0.013761	0.01408	0.0083952	0.0094476
3159.9	0.0060695	0.012385	0.0069315	0.014129	0.0090337	0.012505
3158.9	0.0034901	0.014037	0.0087272	0.014994	0.0051754	0.0069075
3158	0.004615	0.014592	0.013173	0.0098088	0.0060903	0.0036102
3157.1	0.0050515	0.011788	0.012179	0.0049378	0.0082572	0.0047849
3156.1	0.0061724	0.012406	0.0065786	0.0090212	0.0091465	0.002804
3155.2	0.0098653	0.014385	-0.0020334	0.013754	0.013581	0.0060248
3154.3	0.011247	0.012627	-0.00019089	0.013474	0.017611	0.015939
3153.3	0.0091191	0.013115	0.007252	0.0091871	0.018604	0.018035
3152.4	0.0091594	0.016489	0.0073088	0.0087036	0.017273	0.014281
3151.5	0.01262	0.016566	0.0059817	0.011751	0.014442	0.011355
3150.5	0.011618	0.016153	0.0045583	0.012963	0.010828	0.008784
3149.6	0.0077853	0.013238	0.0019984	0.01214	0.010062	0.0060584
3148.7	0.0078412	0.0049188	0.0066247	0.0093048	0.011982	0.0052556
3147.7	0.0061512	-0.00041482	0.0095639	0.011173	0.010894	0.0076448
3146.8	0.0031749	0.0031922	0.0041897	0.013082	0.010319	0.010068
3145.9	0.0044423	0.0096413	0.0039358	0.0098032	0.011758	0.010422
3144.9	0.012008	0.014	0.014982	0.0093918	0.0050505	0.0093553
3144	0.015341	0.015422	0.025047	0.011088	-0.0026299	0.0090875
3143.1	0.0078248	0.01147	0.023038	0.01134	0.0048239	0.011978
3142.1	0.0070692	0.010577	0.011166	0.01358	0.014036	0.011393
3141.2	0.014538	0.01092	0.0045314	0.017779	0.015245	0.0075048
3140.3	0.010986	0.0057233	0.0057354	0.020585	0.01475	0.0085314
3139.4	0.0062406	0.0030989	0.0091832	0.018199	0.011607	0.0094876
3138.4	0.013527	0.0054676	0.012954	0.014676	0.0076346	0.0099109
3137.5	0.019806	0.0057371	0.014091	0.013198	0.0063683	0.0094872
3136.6	0.019194	0.010342	0.012524	0.011286	0.0066071	0.013754
3135.6	0.013392	0.014933	0.007553	0.0086085	0.010458	0.018427
3134.7	0.0027218	0.0083533	0.0061608	0.0097592	0.015482	0.0099446
3133.8	-0.0020526	0.0035316	0.010064	0.015981	0.014298	0.0064796
3132.8	0.0017835	0.0064701	0.013989	0.012543	0.012128	0.010347
3131.9	0.0083618	0.0068088	0.017286	0.0089877	0.0071492	0.010088
3131	0.011345	0.0068883	0.013254	0.0098643	0.0016623	0.013182
3130	0.008888	0.0096659	0.0075118	0.0082656	0.0051386	0.013552
3129.1	0.012758	0.01091	0.0084701	0.007621	0.0086855	0.0080492
3128.2	0.016764	0.010404	0.0091215	0.013656	0.0093689	0.0081356
3127.2	0.011876	0.010257	0.0067051	0.018651	0.012855	0.015454
3126.3	0.0091087	0.0076353	0.0085611	0.018723	0.015666	0.020717
3125.4	0.0075939	0.0077619	0.013505	0.018632	0.013498	0.017891
3124.4	0.011109	0.014371	0.013985	0.014937	0.0079951	0.010474
3123.5	0.014623	0.017692	0.012148	0.015192	0.0058688	0.0096013
3122.6	0.014455	0.015718	0.010857	0.021536	0.0085692	0.012219
3121.6	0.014132	0.011066	0.007064	0.019045	0.0097951	0.014977
3120.7	0.015091	0.0027714	0.0042621	0.011397	0.0085159	0.01648
3119.8	0.01712	0.0092848	0.009246	0.010036	0.0048944	0.01333
3118.8	0.015465	0.017962	0.01493	0.012482	0.0060422	0.0093146
3117.9	0.0099558	0.011688	0.013965	0.015544	0.011917	0.010942
3117	0.011395	0.0095204	0.012367	0.012946	0.016604	0.014122
3116.1	0.0098929	0.013501	0.012479	0.0078788	0.016333	0.011568
3115.1	0.0049766	0.011456	0.014134	0.0088493	0.012885	0.011088
3114.2	0.0095405	0.0070512	0.01151	0.012049	0.010468	0.011668
3113.3	0.011886	0.009372	0.0065654	0.012293	0.01207	0.011035
3112.3	0.0054434	0.01244	0.0086247	0.012359	0.010884	0.012434
3111.4	0.0044466	0.013364	0.014015	0.013145	0.010143	0.016495
3110.5	0.012251	0.012229	0.012329	0.018358	0.010342	0.015176
3109.5	0.015677	0.010367	0.010578	0.016128	0.010501	0.010133
3108.6	0.010274	0.010465	0.010661	0.0087136	0.012083	0.011244
3107.7	0.011175	0.01006	0.0072973	0.007058	0.012271	0.014066
3106.7	0.018079	0.0081906	0.0077354	0.0082275	0.011422	0.014147
3105.8	0.020372	0.006597	0.011623	0.0092283	0.010247	0.014558
3104.9	0.016607	0.0084074	0.010546	0.0085231	0.0098451	0.013816
3103.9	0.014604	0.009937	0.0062374	0.012515	0.011493	0.0093036
3103	0.014919	0.0086835	0.0090355	0.019201	0.012327	0.01112
3102.1	0.015542	0.0096011	0.013857	0.023201	0.009885	0.017354
3101.1	0.015199	0.013432	0.010958	0.018674	0.010882	0.020988
3100.2	0.012272	0.014848	0.0081549	0.012557	0.013549	0.019428
3099.3	0.013129	0.013495	0.012473	0.01254	0.009113	0.011374
3098.3	0.015947	0.0098456	0.013134	0.013174	0.0074473	0.0052472
3097.4	0.015221	0.010196	0.013765	0.012785	0.010405	0.0089361
3096.5	0.01342	0.010293	0.014099	0.014624	0.011376	0.011548
3095.6	0.013057	0.01005	0.0099714	0.013212	0.013729	0.011188
3094.6	0.013866	0.012522	0.0076844	0.0089718	0.015463	0.014046
3093.7	0.015366	0.010901	0.0058582	0.010119	0.0096051	0.016413
3092.8	0.01291	0.010342	0.0048476	0.013155	0.0081567	0.015763
3091.8	0.010436	0.014022	0.0065782	0.013492	0.014134	0.013063
3090.9	0.014103	0.015389	0.013859	0.013393	0.013257	0.013236
3090	0.018455	0.021268	0.020421	0.019285	0.008089	0.012022
3089	0.017858	0.022879	0.017751	0.024956	0.0086891	0.010252
3088.1	0.015221	0.014052	0.012155	0.020571	0.011122	0.012686
3087.2	0.011823	0.012767	0.011479	0.013411	0.011358	0.015218
3086.2	0.013068	0.012991	0.013157	0.012676	0.013944	0.018483
3085.3	0.016858	0.010283	0.015541	0.017814	0.015565	0.015447
3084.4	0.017506	0.016718	0.01814	0.020082	0.014112	0.009191
3083.4	0.015589	0.020417	0.016687	0.016945	0.014681	0.010708
3082.5	0.015717	0.020979	0.017261	0.016758	0.012907	0.013925
3081.6	0.016861	0.023757	0.0233	0.019511	0.012643	0.015621
3080.6	0.018793	0.016125	0.021471	0.017335	0.0159	0.018355
3079.7	0.019858	0.0074459	0.014786	0.015638	0.018186	0.021758
3078.8	0.013769	0.011708	0.012824	0.015556	0.021048	0.021602
3077.8	0.008614	0.014949	0.015627	0.010947	0.020102	0.021206
3076.9	0.011067	0.012667	0.017148	0.0076451	0.015702	0.019722
3076	0.015236	0.013552	0.019379	0.011626	0.014041	0.017038
3075.1	0.018807	0.014202	0.019917	0.016296	0.015305	0.016282
3074.1	0.020114	0.016142	0.016535	0.017374	0.018549	0.01443
3073.2	0.015794	0.016964	0.015296	0.020064	0.017689	0.01609
3072.3	0.011858	0.011339	0.016341	0.021887	0.015131	0.020362
3071.3	0.015694	0.01098	0.016248	0.022944	0.01822	0.018138
3070.4	0.021291	0.016379	0.014264	0.023549	0.021185	0.011918
3069.5	0.019511	0.01923	0.015365	0.018761	0.021428	0.015422
3068.5	0.01704	0.018399	0.021834	0.017267	0.019714	0.021497
3067.6	0.019096	0.019505	0.024263	0.019977	0.017342	0.023132
3066.7	0.019472	0.019443	0.020065	0.02241	0.019601	0.021503
3065.7	0.019798	0.018598	0.01963	0.020914	0.023374	0.020342
3064.8	0.019203	0.018317	0.02183	0.019614	0.021358	0.022036
3063.9	0.020138	0.018671	0.020127	0.020005	0.020865	0.023225
3062.9	0.022245	0.018752	0.017047	0.022118	0.021257	0.017549
3062	0.024899	0.019019	0.014994	0.025843	0.018497	0.016505
3061.1	0.023873	0.019166	0.015245	0.02782	0.019212	0.019858
3060.1	0.020858	0.017663	0.017046	0.02708	0.023114	0.018117
3059.2	0.019734	0.018767	0.023139	0.025997	0.024311	0.013833
3058.3	0.017364	0.019271	0.021271	0.024112	0.023667	0.014772
3057.3	0.015677	0.018052	0.015025	0.021495	0.02271	0.020917
3056.4	0.017426	0.01928	0.0145	0.019819	0.020012	0.022241
3055.5	0.019276	0.018116	0.013993	0.019133	0.018131	0.019711
3054.6	0.020096	0.018243	0.0152	0.018327	0.017912	0.018216
3053.6	0.020873	0.02176	0.014699	0.019927	0.021249	0.017528
3052.7	0.021474	0.020434	0.015814	0.02365	0.023229	0.024405
3051.8	0.021854	0.018142	0.016211	0.024308	0.021154	0.028159
3050.8	0.018005	0.016887	0.013334	0.022586	0.019095	0.022613
3049.9	0.012483	0.017619	0.016217	0.021119	0.020466	0.019114
3049	0.01195	0.018754	0.018767	0.019203	0.023741	0.018675
3048	0.018312	0.018265	0.022309	0.020216	0.021922	0.021999
3047.1	0.021651	0.022001	0.025851	0.024439	0.02067	0.027997
3046.2	0.019694	0.026522	0.028113	0.028879	0.021919	0.029126
3045.2	0.022488	0.026332	0.029999	0.031627	0.020628	0.024834
3044.3	0.026022	0.022102	0.029262	0.023569	0.01742	0.020386
3043.4	0.026699	0.018063	0.029368	0.019393	0.017451	0.024922
3042.4	0.028962	0.017841	0.030234	0.022845	0.020383	0.0294
3041.5	0.030322	0.019894	0.029732	0.024194	0.022163	0.03262
3040.6	0.030026	0.026184	0.026196	0.025822	0.025793	0.035621
3039.6	0.025695	0.031299	0.023075	0.030278	0.028253	0.031152
3038.7	0.025356	0.030604	0.024315	0.031965	0.025105	0.027221
3037.8	0.028714	0.02971	0.027153	0.029399	0.025279	0.028398
3036.8	0.030991	0.030532	0.026219	0.027932	0.028778	0.028768
3035.9	0.033026	0.029346	0.024524	0.030203	0.028203	0.029127
3035	0.033629	0.029152	0.028111	0.033176	0.025812	0.030129
3034.1	0.034096	0.029293	0.031775	0.034221	0.030631	0.033043
3033.1	0.032276	0.028199	0.031367	0.037992	0.03737	0.034998
3032.2	0.035061	0.036234	0.03312	0.038593	0.037985	0.031909
3031.3	0.036799	0.048082	0.035612	0.034983	0.03645	0.031397
3030.3	0.035071	0.047639	0.036635	0.036864	0.037703	0.036627
3029.4	0.043613	0.043738	0.041704	0.041139	0.044465	0.042431
3028.5	0.050597	0.044782	0.050317	0.044795	0.04997	0.04375
3027.5	0.046625	0.050048	0.049651	0.049979	0.051254	0.045569
3026.6	0.049775	0.05545	0.04977	0.05042	0.053199	0.054445
3025.7	0.05771	0.058269	0.057637	0.049681	0.059636	0.060692
3024.7	0.062526	0.061113	0.065915	0.058116	0.067033	0.064757
3023.8	0.067635	0.068401	0.070837	0.071772	0.069298	0.070321
3022.9	0.07559	0.07611	0.072846	0.080559	0.074173	0.07806
3021.9	0.085433	0.084651	0.081232	0.086528	0.082987	0.086604
3021	0.091322	0.09322	0.096405	0.091571	0.088055	0.096218
3020.1	0.094565	0.098439	0.10745	0.095702	0.095655	0.10281
3019.1	0.10386	0.10373	0.11727	0.10229	0.11001	0.11514
3018.2	0.11334	0.11426	0.12298	0.11687	0.1218	0.12811
3017.3	0.12532	0.1234	0.12591	0.13431	0.12751	0.1343
3016.3	0.13687	0.13077	0.12899	0.13772	0.13121	0.14355
3015.4	0.14426	0.14189	0.13267	0.13359	0.13706	0.15623
3014.5	0.15051	0.14695	0.14392	0.14096	0.14844	0.16322
3013.6	0.15742	0.15236	0.15164	0.15032	0.15605	0.16912
3012.6	0.16097	0.16221	0.15751	0.15228	0.15851	0.17541
3011.7	0.1662	0.16241	0.16538	0.15431	0.15767	0.17789
3010.8	0.16937	0.15625	0.16521	0.15448	0.15892	0.17507
3009.8	0.16757	0.15523	0.15815	0.15117	0.15794	0.1671
3008.9	0.16227	0.15842	0.14973	0.14842	0.15332	0.16626
3008	0.15414	0.1515	0.14583	0.1431	0.15157	0.16785
3007	0.14813	0.14204	0.1449	0.14203	0.15001	0.15794
3006.1	0.14109	0.13632	0.1376	0.13774	0.14382	0.14221
3005.2	0.13377	0.12782	0.13257	0.1229	0.13768	0.13656
3004.2	0.13122	0.11856	0.12915	0.11464	0.13278	0.12968
3003.3	0.12366	0.11372	0.12012	0.11101	0.12241	0.11615
3002.4	0.11359	0.11148	0.1089	0.10155	0.10676	0.10771
3001.4	0.10991	0.10673	0.10187	0.096283	0.10085	0.10665
3000.5	0.10953	0.1004	0.097985	0.093943	0.10176	0.10202
2999.6	0.10388	0.094012	0.095869	0.086817	0.097078	0.093431
2998.6	0.090643	0.091096	0.09494	0.080756	0.095803	0.086306
2997.7	0.084006	0.086557	0.091452	0.07684	0.095288	0.085719
2996.8	0.090698	0.082471	0.087182	0.077124	0.0906	0.090862
2995.8	0.092504	0.084578	0.08491	0.077916	0.087626	0.086509
2994.9	0.085939	0.082273	0.084993	0.07703	0.083894	0.083003
2994	0.083229	0.080804	0.085234	0.073436	0.081973	0.083413
2993.1	0.08045	0.082916	0.084137	0.073303	0.083167	0.083165
2992.1	0.077145	0.081379	0.081593	0.076949	0.081205	0.084507
2991.2	0.073681	0.08159	0.080975	0.076282	0.081257	0.084303
2990.3	0.076954	0.085332	0.084769	0.075774	0.085753	0.080904
2989.3	0.085794	0.085506	0.087731	0.075125	0.089885	0.082148
2988.4	0.089193	0.085877	0.090047	0.072164	0.091404	0.085425
2987.5	0.090817	0.088876	0.091691	0.077917	0.091046	0.085956
2986.5	0.090338	0.093539	0.090557	0.084277	0.092896	0.090808
2985.6	0.088304	0.098731	0.092327	0.08339	0.099462	0.096585
2984.7	0.094845	0.10109	0.10034	0.091042	0.10143	0.10111
2983.7	0.10233	0.105	0.1038	0.099096	0.10116	0.1025
2982.8	0.10617	0.10715	0.1043	0.10032	0.10836	0.1006
2981.9	0.11258	0.10805	0.10632	0.099835	0.11356	0.10685
2980.9	0.11621	0.11449	0.11199	0.104	0.11826	0.11716
2980	0.12265	0.11955	0.12006	0.11001	0.11947	0.12254
2979.1	0.1327	0.12859	0.12709	0.1158	0.12019	0.12556
2978.1	0.13902	0.13744	0.13641	0.12233	0.12871	0.12802
2977.2	0.14051	0.14044	0.14339	0.13104	0.13785	0.13092
2976.3	0.14271	0.14741	0.14662	0.13839	0.14683	0.14292
2975.3	0.15331	0.15753	0.15837	0.14196	0.15736	0.15952
2974.4	0.1668	0.16437	0.17329	0.14789	0.17013	0.1717
2973.5	0.17886	0.17338	0.18177	0.161	0.1818	0.18299
2972.6	0.19675	0.18274	0.18866	0.17205	0.19071	0.19088
2971.6	0.21035	0.20087	0.20276	0.18208	0.20002	0.19915
2970.7	0.22215	0.22394	0.22063	0.19886	0.2072	0.21961
2969.8	0.23393	0.23596	0.23284	0.2121	0.21903	0.23677
2968.8	0.24016	0.24184	0.24622	0.21622	0.23776	0.24893
2967.9	0.25477	0.25603	0.26086	0.22858	0.25651	0.26221
2967	0.27198	0.27492	0.27285	0.24851	0.26969	0.27632
2966	0.28836	0.28937	0.28801	0.26327	0.28309	0.286
2965.1	0.30268	0.30282	0.30514	0.26804	0.30071	0.29426
2964.2	0.31653	0.31738	0.32313	0.27716	0.31814	0.30734
2963.2	0.33457	0.32367	0.33584	0.29271	0.33529	0.32479
2962.3	0.34429	0.32998	0.34424	0.30309	0.35	0.34116
2961.4	0.34306	0.33825	0.354	0.30724	0.35712	0.34439
2960.4	0.34736	0.34915	0.35946	0.31963	0.36305	0.34857
2959.5	0.35702	0.35999	0.36312	0.33091	0.36444	0.36522
2958.6	0.3635	0.36504	0.37236	0.32933	0.35875	0.38089
2957.6	0.36575	0.37345	0.37885	0.33374	0.35708	0.37286
2956.7	0.36992	0.3827	0.37914	0.34091	0.36939	0.36164
2955.8	0.37174	0.37359	0.37643	0.34095	0.38006	0.36999
2954.8	0.37199	0.35973	0.38144	0.34112	0.38777	0.37573
2953.9	0.37034	0.35827	0.38785	0.34401	0.38421	0.37467
2953	0.37567	0.36741	0.39098	0.34349	0.37657	0.38137
2952.1	0.37901	0.37713	0.38955	0.34242	0.37911	0.38777
2951.1	0.37938	0.38141	0.37979	0.3469	0.38661	0.38845
2950.2	0.38357	0.38087	0.38067	0.34862	0.39266	0.38655
2949.3	0.39027	0.38423	0.39393	0.34431	0.38651	0.38475
2948.3	0.3998	0.39829	0.40303	0.35282	0.39045	0.39255
2947.4	0.41535	0.41129	0.41507	0.36608	0.40949	0.40686
2946.5	0.43139	0.42262	0.43236	0.37456	0.42714	0.42929
2945.5	0.45007	0.43725	0.45388	0.39298	0.4455	0.44752
2944.6	0.46881	0.44876	0.47633	0.41192	0.46756	0.46024
2943.7	0.48406	0.46836	0.49533	0.42757	0.48674	0.47682
2942.7	0.50925	0.50603	0.50001	0.44222	0.50564	0.49153
2941.8	0.53032	0.53972	0.50784	0.46123	0.52458	0.51677
2940.9	0.54478	0.54901	0.54577	0.48302	0.54104	0.5504
2939.9	0.57502	0.57094	0.59005	0.52086	0.57706	0.58108
2939	0.61653	0.61086	0.62171	0.55609	0.61474	0.59906
2938.1	0.64712	0.64207	0.65272	0.57928	0.63448	0.62586
2937.1	0.65793	0.67516	0.67481	0.59952	0.6719	0.65801
2936.2	0.68743	0.69931	0.68561	0.61684	0.71962	0.68662
2935.3	0.73872	0.7304	0.69755	0.64569	0.72929	0.72864
2934.3	0.76804	0.76819	0.73594	0.69476	0.75408	0.76396
2933.4	0.79685	0.79473	0.80527	0.72352	0.80466	0.79124
2932.5	0.83223	0.83138	0.84776	0.72295	0.83634	0.82308
2931.6	0.84468	0.87528	0.8556	0.74277	0.8319	0.86772
2930.6	0.87044	0.90451	0.8696	0.75843	0.8422	0.90274
2929.7	0.89208	0.9008	0.88434	0.77244	0.88588	0.89294
2928.8	0.90812	0.9059	0.89493	0.78879	0.91497	0.88821
2927.8	0.91772	0.92084	0.90898	0.82147	0.92772	0.91837
2926.9	0.92651	0.92949	0.91609	0.84131	0.92325	0.93306
2926	0.94189	0.93511	0.92127	0.86328	0.9291	0.92621
2925	0.95806	0.95538	0.92705	0.84716	0.94476	0.93045
2924.1	0.93928	0.96381	0.9107	0.81419	0.94434	0.90457
2923.2	0.90525	0.9719	0.9067	0.82467	0.92339	0.89368
2922.2	0.8933	0.97969	0.90351	0.82706	0.91728	0.87515
2921.3	0.8922	0.95746	0.87295	0.81048	0.90505	0.85022
2920.4	0.88874	0.93137	0.86585	0.77575	0.88977	0.86273
2919.4	0.86677	0.90894	0.86507	0.75006	0.85423	0.85584
2918.5	0.81203	0.86291	0.83245	0.72108	0.82429	0.80679
2917.6	0.77171	0.80049	0.79643	0.68993	0.8184	0.77416
2916.6	0.76079	0.76504	0.75893	0.6662	0.79326	0.75436
2915.7	0.73379	0.76353	0.72427	0.66218	0.75536	0.71471
2914.8	0.71374	0.73359	0.68933	0.64975	0.69664	0.67504
2913.8	0.69726	0.69163	0.67463	0.60541	0.65508	0.66153
2912.9	0.6619	0.65354	0.65527	0.56854	0.64217	0.65321
2912	0.62054	0.62724	0.62456	0.55668	0.61917	0.63271
2911.1	0.59461	0.60962	0.59307	0.53509	0.60068	0.60138
2910.1	0.57887	0.58441	0.57336	0.51093	0.58299	0.57174
2909.2	0.55816	0.56472	0.56141	0.48656	0.54613	0.54742
2908.3	0.5302	0.53657	0.53823	0.46728	0.51797	0.53147
2907.3	0.52113	0.51454	0.51358	0.46143	0.51894	0.51523
2906.4	0.50751	0.5026	0.50095	0.44994	0.51084	0.49124
2905.5	0.48444	0.48285	0.48687	0.43583	0.48574	0.47375
2904.5	0.47011	0.46827	0.4717	0.41914	0.46302	0.45492
2903.6	0.4553	0.45438	0.45368	0.40146	0.45213	0.4292
2902.7	0.4351	0.43494	0.43372	0.38329	0.43438	0.41493
2901.7	0.41925	0.42516	0.41171	0.36768	0.40405	0.4074
2900.8	0.41438	0.41	0.40059	0.35737	0.39278	0.40079
2899.9	0.40946	0.39274	0.38991	0.35089	0.38778	0.3931
2898.9	0.3918	0.37921	0.38011	0.33378	0.37916	0.38197
2898	0.36999	0.36924	0.3717	0.32156	0.37068	0.36636
2897.1	0.35294	0.36338	0.355	0.31903	0.35859	0.3552
2896.1	0.34703	0.351	0.34132	0.31095	0.34882	0.33979
2895.2	0.33921	0.33584	0.33563	0.29759	0.33973	0.32831
2894.3	0.32831	0.33344	0.32391	0.29091	0.32465	0.31438
2893.3	0.31805	0.32146	0.3074	0.2824	0.31051	0.30814
2892.4	0.30535	0.29633	0.29697	0.27137	0.30694	0.30418
2891.5	0.29572	0.28433	0.29594	0.26042	0.30233	0.29013
2890.6	0.28303	0.27848	0.2874	0.2571	0.28805	0.28091
2889.6	0.27855	0.27255	0.27316	0.25325	0.27464	0.27551
2888.7	0.2783	0.27144	0.27071	0.24334	0.26685	0.26609
2887.8	0.27363	0.27086	0.26779	0.23436	0.2618	0.25932
2886.8	0.26328	0.26415	0.26081	0.23119	0.26159	0.25752
2885.9	0.25403	0.25345	0.25656	0.22908	0.25817	0.25231
2885	0.25347	0.2492	0.25479	0.22843	0.25858	0.24866
2884	0.25291	0.24795	0.25108	0.22884	0.25644	0.24911
2883.1	0.24654	0.24839	0.25158	0.22584	0.25203	0.24559
2882.2	0.24693	0.25054	0.2525	0.22359	0.25599	0.24164
2881.2	0.25263	0.24734	0.25299	0.22552	0.26441	0.25
2880.3	0.25946	0.24797	0.25545	0.23362	0.2651	0.25588
2879.4	0.26581	0.25796	0.26016	0.23827	0.26173	0.26164
2878.4	0.27461	0.26732	0.26538	0.23736	0.26405	0.26648
2877.5	0.28543	0.27538	0.27345	0.24199	0.27316	0.27011
2876.6	0.29235	0.2898	0.28294	0.25658	0.28582	0.27818
2875.6	0.29619	0.30366	0.28791	0.27216	0.29871	0.29237
2874.7	0.30097	0.30961	0.29646	0.28078	0.30763	0.30165
2873.8	0.30877	0.30976	0.3096	0.28212	0.31372	0.30259
2872.8	0.32064	0.30511	0.31402	0.2877	0.31232	0.30604
2871.9	0.32424	0.31381	0.3234	0.29289	0.31424	0.31295
2871	0.32276	0.32564	0.34031	0.29168	0.33215	0.31977
2870.1	0.32677	0.32929	0.34076	0.29447	0.35295	0.32669
2869.1	0.34312	0.3327	0.33826	0.30721	0.35781	0.33468
2868.2	0.36138	0.34591	0.3513	0.32806	0.35802	0.35306
2867.3	0.36714	0.36706	0.36617	0.34285	0.37054	0.3719
2866.3	0.38564	0.38883	0.37676	0.35608	0.39578	0.37867
2865.4	0.41689	0.41199	0.40721	0.36906	0.42084	0.40053
2864.5	0.44135	0.44225	0.43773	0.3902	0.43393	0.42994
2863.5	0.46867	0.46758	0.46053	0.41693	0.45635	0.45724
2862.6	0.50822	0.48867	0.48705	0.43853	0.48574	0.49208
2861.7	0.53419	0.5219	0.51926	0.4652	0.52372	0.52127
2860.7	0.55121	0.56594	0.54622	0.49665	0.55959	0.5429
2859.8	0.5731	0.59913	0.55891	0.51969	0.59456	0.57555
2858.9	0.61117	0.61164	0.59359	0.53428	0.61922	0.6002
2857.9	0.65714	0.62675	0.63017	0.54839	0.63417	0.61417
2857	0.65947	0.64466	0.64516	0.56149	0.64283	0.62201
2856.1	0.64855	0.65685	0.66178	0.57135	0.65716	0.63977
2855.1	0.64997	0.662	0.6587	0.5812	0.65943	0.65027
2854.2	0.63132	0.66594	0.64055	0.57005	0.64668	0.63671
2853.3	0.61528	0.64891	0.61048	0.54104	0.62595	0.61956
2852.3	0.60295	0.61017	0.58692	0.51656	0.60255	0.58963
2851.4	0.5759	0.57576	0.56244	0.49422	0.57544	0.55567
2850.5	0.52897	0.54031	0.51955	0.46004	0.52653	0.51951
2849.5	0.4748	0.49198	0.47647	0.42148	0.47541	0.47484
2848.6	0.43442	0.44415	0.44025	0.38894	0.43757	0.43433
2847.7	0.39848	0.40519	0.40428	0.36076	0.40511	0.39649
2846.8	0.36572	0.36542	0.36589	0.3285	0.36958	0.3541
2845.8	0.32766	0.32989	0.33157	0.30019	0.33314	0.32048
2844.9	0.29476	0.30074	0.30688	0.27147	0.30563	0.29703
2844	0.27545	0.27928	0.28204	0.2442	0.27754	0.27343
2843	0.25391	0.26005	0.25437	0.22418	0.25248	0.25609
2842.1	0.22924	0.23052	0.23244	0.20887	0.23385	0.23581
2841.2	0.21513	0.20931	0.21614	0.19392	0.21633	0.21735
2840.2	0.20307	0.20329	0.20392	0.17916	0.19892	0.20141
2839.3	0.18542	0.19458	0.19035	0.16615	0.18524	0.18716
2838.4	0.16965	0.17931	0.1805	0.15504	0.17956	0.17633
2837.4	0.16255	0.16742	0.17252	0.14704	0.17069	0.16415
2836.5	0.16244	0.15447	0.16251	0.14195	0.16036	0.14982
2835.6	0.15513	0.14635	0.1486	0.1338	0.15035	0.1421
2834.6	0.1421	0.14331	0.1358	0.12797	0.14295	0.1391
2833.7	0.13138	0.13472	0.13115	0.12586	0.13645	0.13199
2832.8	0.12674	0.12459	0.12499	0.11965	0.13098	0.1231
2831.8	0.12379	0.12191	0.11456	0.11415	0.1226	0.11432
2830.9	0.1153	0.11671	0.10969	0.11097	0.11178	0.10861
2830	0.10287	0.10684	0.10967	0.10371	0.10667	0.10736
2829	0.099669	0.099232	0.10381	0.089529	0.10139	0.1031
2828.1	0.10197	0.099261	0.098253	0.084133	0.097856	0.095128
2827.2	0.099118	0.096926	0.092605	0.085426	0.098921	0.091209
2826.3	0.090448	0.089754	0.083532	0.081146	0.094402	0.087536
2825.3	0.086757	0.082165	0.078973	0.07357	0.084734	0.082036
2824.4	0.089749	0.075153	0.07773	0.073996	0.080009	0.082197
2823.5	0.0861	0.074006	0.074598	0.076599	0.079064	0.07781
2822.5	0.07551	0.074254	0.074574	0.074816	0.076283	0.071035
2821.6	0.070158	0.072273	0.072431	0.069903	0.073449	0.070252
2820.7	0.067718	0.072935	0.071842	0.066099	0.068148	0.069581
2819.7	0.06563	0.069554	0.071045	0.058254	0.065378	0.067897
2818.8	0.0674	0.062163	0.068919	0.054558	0.064499	0.068972
2817.9	0.068613	0.060137	0.063228	0.057244	0.060783	0.069446
2816.9	0.063361	0.059502	0.058703	0.059127	0.057612	0.06407
2816	0.058436	0.059242	0.062606	0.057046	0.057342	0.059067
2815.1	0.054592	0.056895	0.0622	0.052898	0.055854	0.057618
2814.1	0.052192	0.050311	0.055531	0.049176	0.054996	0.05612
2813.2	0.051095	0.047825	0.0542	0.048052	0.054419	0.053479
2812.3	0.049815	0.047346	0.051481	0.046226	0.052292	0.051797
2811.3	0.047633	0.047972	0.050248	0.046511	0.049783	0.049799
2810.4	0.04725	0.049515	0.049294	0.046398	0.047083	0.045694
2809.5	0.046492	0.049855	0.046488	0.043229	0.046459	0.047106
2808.5	0.045858	0.053658	0.047687	0.044442	0.048641	0.050103
2807.6	0.049063	0.049427	0.047619	0.045796	0.047825	0.042621
2806.7	0.044121	0.041325	0.04435	0.041529	0.046344	0.03741
2805.8	0.041488	0.041188	0.045952	0.04006	0.04469	0.038057
2804.8	0.042432	0.044526	0.043302	0.041376	0.040895	0.041382
2803.9	0.039811	0.043335	0.038347	0.03795	0.036861	0.043607
2803	0.036876	0.038548	0.035275	0.035608	0.041402	0.04166
2802	0.037831	0.036397	0.033571	0.033409	0.041241	0.038406
2801.1	0.03953	0.03564	0.035708	0.034776	0.036533	0.039015
2800.2	0.040093	0.035816	0.040273	0.037175	0.036039	0.038382
2799.2	0.035816	0.038267	0.041188	0.035004	0.036355	0.036115
2798.3	0.033851	0.039562	0.04035	0.033475	0.037829	0.038994
2797.4	0.037624	0.035494	0.038625	0.034953	0.038704	0.038567
2796.4	0.039178	0.034637	0.034016	0.035663	0.035985	0.035014
2795.5	0.034071	0.034552	0.034819	0.035077	0.032271	0.03567
2794.6	0.030288	0.033757	0.035156	0.034974	0.031066	0.033602
2793.6	0.031715	0.032457	0.031828	0.031654	0.032315	0.030424
2792.7	0.035206	0.033653	0.031705	0.027953	0.031759	0.028624
2791.8	0.035474	0.033313	0.033334	0.02972	0.032386	0.029303
2790.8	0.034788	0.028551	0.033671	0.031743	0.033527	0.030173
2789.9	0.033729	0.027087	0.031906	0.031631	0.032196	0.028469
2789	0.032071	0.028116	0.032718	0.031775	0.02982	0.029609
2788	0.03187	0.030182	0.034881	0.027621	0.03349	0.032354
2787.1	0.02958	0.029248	0.031967	0.027274	0.031636	0.032211
2786.2	0.027836	0.030218	0.027387	0.025189	0.026046	0.030029
2785.3	0.026937	0.030195	0.0275	0.022848	0.023232	0.028038
2784.3	0.025877	0.029161	0.02814	0.024212	0.025457	0.025695
2783.4	0.027207	0.030663	0.025622	0.025897	0.028411	0.024703
2782.5	0.028031	0.026159	0.029128	0.026578	0.026146	0.027853
2781.5	0.025007	0.024357	0.032288	0.026024	0.023728	0.030643
2780.6	0.025602	0.02683	0.026548	0.025093	0.023242	0.027435
2779.7	0.024935	0.027017	0.022135	0.022946	0.023741	0.024963
2778.7	0.021595	0.024052	0.022775	0.024217	0.023634	0.025732
2777.8	0.022765	0.024117	0.027169	0.026409	0.022868	0.025451
2776.9	0.027114	0.027601	0.028379	0.022315	0.02125	0.022956
2775.9	0.026815	0.025011	0.02521	0.021874	0.018616	0.023256
2775	0.024212	0.022765	0.021587	0.023945	0.0177	0.024355
2774.1	0.021947	0.022964	0.018025	0.019531	0.019956	0.025201
2773.1	0.019887	0.022265	0.02359	0.018708	0.021804	0.02243
2772.2	0.020347	0.020036	0.026721	0.01882	0.020634	0.019679
2771.3	0.021497	0.021799	0.023941	0.022359	0.021272	0.019679
2770.3	0.019158	0.021939	0.018951	0.02754	0.020664	0.020291
2769.4	0.021939	0.018115	0.016899	0.02374	0.018784	0.01942
2768.5	0.023276	0.018546	0.017645	0.020344	0.019409	0.019851
2767.5	0.018929	0.020749	0.018451	0.021053	0.020148	0.021662
2766.6	0.020196	0.019218	0.019545	0.020748	0.019661	0.02626
2765.7	0.024582	0.018449	0.018339	0.023985	0.02022	0.026867
2764.8	0.023339	0.021748	0.020724	0.024889	0.020299	0.022687
2763.8	0.020288	0.023748	0.024391	0.020375	0.021649	0.019368
2762.9	0.017589	0.023189	0.023119	0.018286	0.023843	0.019401
2762	0.018645	0.022424	0.021086	0.019606	0.022297	0.02129
2761	0.01875	0.019846	0.021356	0.023108	0.021313	0.021839
2760.1	0.0183	0.021851	0.020994	0.026453	0.019396	0.018377
2759.2	0.02129	0.025626	0.020837	0.024615	0.017635	0.015217
2758.2	0.023582	0.025205	0.019647	0.022633	0.019574	0.016199
2757.3	0.022268	0.022068	0.019261	0.021382	0.019096	0.017233
2756.4	0.018419	0.018625	0.022276	0.019982	0.018676	0.015852
2755.4	0.016569	0.01838	0.020686	0.018094	0.02233	0.015874
2754.5	0.015804	0.021199	0.018154	0.017307	0.023379	0.020673
2753.6	0.02136	0.020935	0.017533	0.015416	0.022426	0.025269
2752.6	0.022161	0.021715	0.018169	0.014376	0.020409	0.025611
2751.7	0.017941	0.02305	0.017673	0.017508	0.017602	0.022664
2750.8	0.016853	0.021905	0.01734	0.020627	0.019116	0.017395
2749.8	0.019772	0.021608	0.022635	0.019563	0.024486	0.015688
2748.9	0.023713	0.018396	0.022337	0.018585	0.022786	0.017104
2748	0.02259	0.019149	0.017757	0.018102	0.017872	0.016672
2747	0.01707	0.020958	0.018443	0.017549	0.017602	0.019935
2746.1	0.017443	0.019728	0.022158	0.019397	0.018684	0.024724
2745.2	0.018081	0.020873	0.025424	0.02073	0.018933	0.023767
2744.3	0.018166	0.019818	0.024444	0.020618	0.019835	0.02036
2743.3	0.019256	0.01811	0.021005	0.018934	0.018756	0.017931
2742.4	0.020459	0.018919	0.019058	0.014721	0.016474	0.020014
2741.5	0.017732	0.021102	0.021902	0.0179	0.019071	0.020471
2740.5	0.018654	0.019488	0.025499	0.019673	0.020864	0.018065
2739.6	0.019354	0.017332	0.023132	0.016685	0.021411	0.017951
2738.7	0.018899	0.02053	0.01915	0.017722	0.019434	0.02241
2737.7	0.021828	0.020172	0.018206	0.022895	0.018388	0.026447
2736.8	0.019174	0.020031	0.019828	0.021021	0.019026	0.023868
2735.9	0.019522	0.022483	0.020499	0.017206	0.019413	0.021335
2734.9	0.024229	0.020352	0.018996	0.017219	0.019831	0.019969
2734	0.021478	0.016637	0.019157	0.018555	0.018187	0.020568
2733.1	0.017523	0.017168	0.023326	0.021961	0.019761	0.020037
2732.1	0.017744	0.019044	0.02099	0.024076	0.019146	0.018684
2731.2	0.016864	0.016885	0.017081	0.023497	0.019172	0.021418
2730.3	0.01533	0.0183	0.018291	0.021506	0.020186	0.021047
2729.3	0.017746	0.02127	0.01999	0.019583	0.016767	0.020371
2728.4	0.021313	0.01876	0.022095	0.019468	0.017167	0.021797
2727.5	0.022792	0.015012	0.021737	0.018423	0.023746	0.020788
2726.5	0.023552	0.013557	0.019885	0.019223	0.025734	0.019268
2725.6	0.020047	0.016128	0.022283	0.021134	0.023777	0.018412
2724.7	0.016779	0.021184	0.025331	0.017616	0.019396	0.01726
2723.8	0.01748	0.022354	0.021517	0.016355	0.020107	0.017775
2722.8	0.019744	0.019744	0.016577	0.017165	0.022772	0.020713
2721.9	0.021127	0.016943	0.017328	0.017617	0.022171	0.019066
2721	0.023095	0.018162	0.018531	0.019057	0.022416	0.017613
2720	0.020092	0.017399	0.02005	0.018044	0.024724	0.017379
2719.1	0.015019	0.016085	0.023949	0.018894	0.020868	0.016836
2718.2	0.016986	0.017333	0.022245	0.02174	0.017784	0.017555
2717.2	0.019017	0.018093	0.016944	0.023629	0.016277	0.020727
2716.3	0.019324	0.018685	0.013407	0.021791	0.015922	0.019156
2715.4	0.019522	0.019254	0.015341	0.018904	0.016759	0.015239
2714.4	0.018939	0.021867	0.01676	0.018224	0.017192	0.015395
2713.5	0.017927	0.021271	0.018173	0.016862	0.019271	0.018729
2712.6	0.020009	0.01918	0.019204	0.016974	0.021142	0.023113
2711.6	0.017366	0.017785	0.021395	0.015016	0.02038	0.019767
2710.7	0.01428	0.019542	0.020399	0.014938	0.015365	0.013978
2709.8	0.017239	0.02069	0.016021	0.017353	0.012692	0.012349
2708.8	0.020679	0.020631	0.014808	0.019104	0.018301	0.013433
2707.9	0.018945	0.01873	0.018403	0.01836	0.022838	0.016198
2707	0.015452	0.020314	0.018337	0.017824	0.021027	0.018464
2706	0.015546	0.018453	0.016494	0.017146	0.018772	0.017741
2705.1	0.017368	0.016004	0.017251	0.01682	0.017191	0.014441
2704.2	0.01727	0.015122	0.020622	0.017988	0.014556	0.015251
2703.3	0.017821	0.016683	0.020471	0.018675	0.014247	0.017953
2702.3	0.016445	0.016456	0.019131	0.019533	0.014738	0.020162
2701.4	0.016064	0.016932	0.018478	0.020724	0.017485	0.018865
2700.5	0.017632	0.020004	0.016509	0.021054	0.021427	0.017191
2699.5	0.019596	0.01814	0.016077	0.020563	0.021826	0.019727
2698.6	0.021316	0.016959	0.014961	0.019702	0.018848	0.01964
2697.7	0.024084	0.018671	0.014265	0.01629	0.018593	0.016001
2696.7	0.025555	0.017437	0.013418	0.013863	0.018559	0.014217
2695.8	0.021577	0.015384	0.016129	0.014377	0.017655	0.0171
2694.9	0.016332	0.014825	0.017709	0.018067	0.01659	0.020564
2693.9	0.017918	0.013334	0.018263	0.019774	0.015975	0.018041
2693	0.0209	0.014891	0.020482	0.018668	0.016381	0.016035
2692.1	0.019775	0.016402	0.020759	0.016426	0.01762	0.017888
2691.1	0.018218	0.017592	0.018512	0.018254	0.018744	0.019314
2690.2	0.020984	0.017479	0.019664	0.021424	0.021272	0.020016
2689.3	0.021466	0.019816	0.021308	0.018375	0.021235	0.019382
2688.3	0.01958	0.022389	0.020904	0.016046	0.020803	0.018044
2687.4	0.020011	0.019538	0.018883	0.018187	0.021082	0.018722
2686.5	0.021402	0.019506	0.019567	0.01849	0.021434	0.01966
2685.5	0.021761	0.022827	0.020804	0.019845	0.019772	0.019128
2684.6	0.021754	0.020094	0.018876	0.019435	0.01912	0.017769
2683.7	0.019816	0.016699	0.016066	0.018513	0.022082	0.019671
2682.8	0.018488	0.014039	0.018398	0.018944	0.023617	0.022009
2681.8	0.018604	0.016778	0.020345	0.016469	0.020333	0.021588
2680.9	0.020858	0.020039	0.017477	0.015593	0.017695	0.020006
2680	0.020293	0.020756	0.017238	0.017997	0.018463	0.017565
2679	0.016402	0.021533	0.018976	0.020289	0.017496	0.018619
2678.1	0.016699	0.019805	0.020097	0.020166	0.016985	0.019858
2677.2	0.017504	0.021417	0.019535	0.018859	0.015484	0.017288
2676.2	0.018212	0.022163	0.018476	0.018095	0.014058	0.018591
2675.3	0.018952	0.020607	0.015713	0.017005	0.015332	0.020699
2674.4	0.021984	0.017807	0.014883	0.017915	0.018031	0.020391
2673.4	0.023691	0.016455	0.018643	0.017121	0.018385	0.0233
2672.5	0.022871	0.017051	0.018575	0.016982	0.018742	0.02271
2671.6	0.02115	0.017872	0.016533	0.018073	0.020674	0.017556
2670.6	0.019822	0.017367	0.016603	0.018954	0.018987	0.016027
2669.7	0.017895	0.015804	0.018392	0.016458	0.016497	0.017461
2668.8	0.016328	0.017096	0.019334	0.016602	0.017167	0.016212
2667.8	0.01804	0.021615	0.019774	0.016335	0.020656	0.018894
2666.9	0.021319	0.026386	0.020155	0.018153	0.021847	0.018886
2666	0.022291	0.023904	0.016717	0.019896	0.020825	0.018288
2665	0.021716	0.019857	0.014995	0.018429	0.016749	0.019186
2664.1	0.020441	0.020382	0.019523	0.018856	0.015166	0.018954
2663.2	0.019323	0.020233	0.020256	0.019967	0.01821	0.017572
2662.3	0.017108	0.01877	0.017216	0.017917	0.019697	0.018294
2661.3	0.017812	0.018585	0.018649	0.018606	0.020209	0.019656
2660.4	0.019565	0.01919	0.018504	0.018867	0.020324	0.020155
2659.5	0.017364	0.017	0.01706	0.016675	0.018238	0.019123
2658.5	0.016059	0.01615	0.017243	0.016141	0.018294	0.012752
2657.6	0.015215	0.015698	0.013479	0.018767	0.016408	0.011041
2656.7	0.015223	0.014685	0.01266	0.022784	0.013959	0.012682
2655.7	0.016149	0.016557	0.014529	0.021018	0.015116	0.013802
2654.8	0.016602	0.015364	0.017048	0.015489	0.016416	0.016793
2653.9	0.015858	0.015149	0.018037	0.014701	0.016459	0.016848
2652.9	0.017391	0.01954	0.01751	0.017132	0.019953	0.012171
2652	0.018657	0.019501	0.016095	0.017165	0.020153	0.0127
2651.1	0.020724	0.019395	0.015085	0.015515	0.01723	0.013865
2650.1	0.018709	0.018437	0.01479	0.016875	0.016756	0.016564
2649.2	0.012568	0.015297	0.016841	0.01598	0.0145	0.018211
2648.3	0.013095	0.014284	0.016317	0.014192	0.015612	0.016865
2647.3	0.014916	0.014458	0.014535	0.014126	0.017894	0.013842
2646.4	0.015338	0.014503	0.017279	0.013754	0.017318	0.011945
2645.5	0.016287	0.013799	0.020562	0.015307	0.018019	0.014183
2644.5	0.013798	0.015079	0.019268	0.01691	0.017378	0.017366
2643.6	0.012183	0.017652	0.016978	0.019741	0.013307	0.01689
2642.7	0.012981	0.018016	0.014985	0.016291	0.0097113	0.01607
2641.8	0.013709	0.017986	0.013596	0.013554	0.012383	0.014687
2640.8	0.014681	0.018829	0.015609	0.016182	0.015944	0.012109
2639.9	0.014319	0.018115	0.017226	0.01634	0.016971	0.011883
2639	0.01524	0.015529	0.016973	0.0142	0.016004	0.014479
2638	0.01506	0.013922	0.014119	0.013918	0.016552	0.016033
2637.1	0.016954	0.014162	0.015279	0.016886	0.016594	0.014452
2636.2	0.017292	0.013677	0.018098	0.016332	0.016152	0.016201
2635.2	0.014799	0.011875	0.017764	0.016588	0.0171	0.017716
2634.3	0.017565	0.012885	0.017622	0.017931	0.014469	0.016038
2633.4	0.018972	0.014164	0.016247	0.016081	0.011925	0.01451
2632.4	0.017673	0.014612	0.015116	0.01531	0.015022	0.013023
2631.5	0.015619	0.015138	0.015314	0.016398	0.016369	0.013448
2630.6	0.015209	0.013505	0.013554	0.015194	0.015561	0.013178
2629.6	0.016591	0.01106	0.012959	0.014053	0.015594	0.012865
2628.7	0.017851	0.010888	0.011451	0.016601	0.014191	0.015458
2627.8	0.018112	0.0136	0.011937	0.01552	0.011646	0.016241
2626.8	0.01624	0.015238	0.016279	0.0144	0.013732	0.01375
2625.9	0.012607	0.016673	0.017418	0.014505	0.012881	0.012778
2625	0.010086	0.016833	0.013556	0.013635	0.014215	0.012239
2624	0.010979	0.015902	0.011174	0.013996	0.018745	0.0099537
2623.1	0.012164	0.014943	0.013381	0.01525	0.015158	0.010489
2622.2	0.012417	0.013739	0.014646	0.012124	0.011382	0.010323
2621.3	0.013942	0.015004	0.013232	0.0097996	0.0116	0.012212
2620.3	0.015636	0.013834	0.013971	0.013068	0.011737	0.013747
2619.4	0.013914	0.01216	0.014223	0.014261	0.013041	0.013652
2618.5	0.012629	0.013256	0.011949	0.014546	0.012877	0.012
2617.5	0.0136	0.011979	0.012007	0.01659	0.012428	0.010559
2616.6	0.013754	0.0091026	0.013922	0.014334	0.013176	0.010311
2615.7	0.012144	0.0094221	0.014822	0.010421	0.013726	0.012452
2614.7	0.011113	0.010739	0.015352	0.010759	0.012669	0.013537
2613.8	0.013948	0.010087	0.014345	0.01129	0.013737	0.01303
2612.9	0.014423	0.0096434	0.012194	0.0094048	0.01301	0.012765
2611.9	0.012186	0.010916	0.0098356	0.0095988	0.014127	0.010631
2611	0.0096398	0.010752	0.012684	0.013938	0.015419	0.01019
2610.1	0.010654	0.010837	0.014731	0.014625	0.011866	0.015409
2609.1	0.010832	0.010988	0.011354	0.012077	0.0088957	0.017312
2608.2	0.0079	0.012263	0.0092565	0.012093	0.0095832	0.014705
2607.3	0.0080552	0.013044	0.010591	0.011982	0.010356	0.012532
2606.3	0.01202	0.011604	0.010516	0.011595	0.010746	0.012318
2605.4	0.014941	0.011387	0.010255	0.010375	0.012071	0.013354
2604.5	0.013624	0.011789	0.010938	0.012123	0.012044	0.014691
2603.5	0.011404	0.011427	0.011479	0.014065	0.011595	0.016717
2602.6	0.011673	0.01051	0.013158	0.012407	0.013105	0.013428
2601.7	0.012083	0.010536	0.015605	0.010706	0.012911	0.0088959
2600.7	0.012109	0.010482	0.014832	0.010553	0.011763	0.0080372
2599.8	0.012622	0.011539	0.011957	0.01232	0.011079	0.0095639
2598.9	0.010842	0.013562	0.011681	0.014311	0.011892	0.0099282
2598	0.00847	0.012691	0.0099882	0.012473	0.014127	0.0091629
2597	0.0081181	0.010528	0.0087157	0.011282	0.014023	0.0086083
2596.1	0.010223	0.010269	0.0097692	0.010857	0.012598	0.010525
2595.2	0.011451	0.011148	0.0091528	0.0078156	0.013269	0.014107
2594.2	0.01061	0.011089	0.011145	0.0079165	0.012314	0.01402
2593.3	0.010363	0.014234	0.014386	0.01273	0.0094518	0.012125
2592.4	0.012438	0.013256	0.012418	0.014125	0.010589	0.011552
2591.4	0.012986	0.0082384	0.00981	0.013748	0.013515	0.011824
2590.5	0.014014	0.0087896	0.0098933	0.012496	0.01218	0.012621
2589.6	0.014641	0.011008	0.011232	0.012295	0.0084399	0.013131
2588.6	0.014575	0.011879	0.011475	0.011941	0.0085393	0.010964
2587.7	0.012543	0.012112	0.011326	0.0092002	0.011741	0.011818
2586.8	0.0099081	0.010962	0.012825	0.0074483	0.013311	0.012313
2585.8	0.0091804	0.0096274	0.014202	0.010928	0.011096	0.01315
2584.9	0.0095907	0.0101	0.014555	0.013268	0.010496	0.014519
2584	0.010209	0.010998	0.013937	0.011478	0.012202	0.012052
2583	0.012389	0.013198	0.012946	0.010885	0.013369	0.0074342
2582.1	0.014046	0.013012	0.01169	0.012391	0.013655	0.0077801
2581.2	0.014188	0.010625	0.010532	0.013264	0.016019	0.0091937
2580.2	0.013511	0.01283	0.0082355	0.011055	0.014187	0.010232
2579.3	0.011385	0.014097	0.0092521	0.010891	0.01144	0.011108
2578.4	0.010681	0.010688	0.012207	0.010999	0.010415	0.010874
2577.5	0.010677	0.0085442	0.011615	0.0088049	0.0083524	0.012469
2576.5	0.010749	0.0094776	0.0080589	0.0077438	0.0091696	0.015528
2575.6	0.011408	0.0097921	0.0069612	0.010022	0.011009	0.015406
2574.7	0.011009	0.011228	0.0091331	0.01258	0.0086507	0.013989
2573.7	0.010525	0.013989	0.011323	0.010471	0.0075063	0.012239
2572.8	0.010451	0.014606	0.012852	0.0095537	0.0088476	0.0091477
2571.9	0.01216	0.011651	0.011669	0.011873	0.010481	0.0065774
2570.9	0.013111	0.011046	0.0098998	0.014046	0.0096171	0.0094053
2570	0.012908	0.012849	0.01275	0.015242	0.0079477	0.010688
2569.1	0.011189	0.012967	0.013021	0.013346	0.0084133	0.011527
2568.1	0.0077627	0.0097516	0.012089	0.011606	0.0097591	0.011164
2567.2	0.0062968	0.006739	0.011669	0.012425	0.011612	0.0094662
2566.3	0.0079735	0.0078938	0.010143	0.014195	0.010091	0.010137
2565.3	0.0086929	0.010243	0.0084932	0.012919	0.0074198	0.011501
2564.4	0.007572	0.010209	0.0092133	0.0098135	0.0049661	0.010083
2563.5	0.0067106	0.0071893	0.011603	0.010409	0.0071301	0.0092418
2562.5	0.006741	0.0076382	0.010371	0.012788	0.012372	0.011062
2561.6	0.0087003	0.0094067	0.0068132	0.012207	0.012637	0.012793
2560.7	0.0098819	0.0088082	0.005848	0.0094495	0.013236	0.013015
2559.7	0.0092865	0.0088332	0.0093832	0.0099257	0.012275	0.012284
2558.8	0.0092636	0.011488	0.013733	0.011424	0.010108	0.010306
2557.9	0.010855	0.011692	0.013502	0.0091891	0.0078984	0.0088889
2557	0.011343	0.0089495	0.011735	0.0067971	0.0064538	0.010958
2556	0.0085955	0.0086959	0.011714	0.0062506	0.0068865	0.012377
2555.1	0.0085375	0.0097507	0.010884	0.0094104	0.0071121	0.01053
2554.2	0.0099223	0.012065	0.0096483	0.010996	0.0089436	0.0093031
2553.2	0.010115	0.012531	0.011255	0.01053	0.011121	0.0076825
2552.3	0.012904	0.0093639	0.011194	0.010234	0.0083631	0.007297
2551.4	0.01292	0.0061971	0.010236	0.0095249	0.0078736	0.0086744
2550.4	0.010356	0.00588	0.01167	0.0099917	0.011141	0.008448
2549.5	0.0092632	0.009536	0.012946	0.011278	0.010778	0.0084827
2548.6	0.0068877	0.0099836	0.012808	0.009159	0.0099302	0.010728
2547.6	0.0063418	0.0059021	0.013088	0.0092659	0.011064	0.010735
2546.7	0.0089575	0.0041388	0.011337	0.011061	0.0092683	0.010295
2545.8	0.011029	0.0059128	0.0087857	0.011568	0.0084051	0.012493
2544.8	0.010042	0.010781	0.0093584	0.011504	0.0089524	0.012979
2543.9	0.008261	0.012362	0.011104	0.010739	0.010055	0.012915
2543	0.0091554	0.0097635	0.0097356	0.010024	0.010483	0.010011
2542	0.010425	0.0083427	0.0079863	0.0095147	0.0095021	0.0077744
2541.1	0.011726	0.0085646	0.0074669	0.0088821	0.0085866	0.0099223
2540.2	0.011477	0.0078894	0.0087363	0.0097022	0.0089247	0.010478
2539.2	0.010144	0.0060501	0.010239	0.010471	0.01038	0.0092846
2538.3	0.0068982	0.0082441	0.0089457	0.0099867	0.011726	0.009139
2537.4	0.0051232	0.010417	0.0077408	0.0066954	0.010742	0.0083578
2536.5	0.0065728	0.0097477	0.0088433	0.0060027	0.0081455	0.0095677
2535.5	0.0088781	0.010157	0.0095192	0.0079198	0.0067538	0.0091098
2534.6	0.0094933	0.0087854	0.007868	0.0096482	0.0081845	0.0086869
2533.7	0.00779	0.0074598	0.0059617	0.0099235	0.0085209	0.010979
2532.7	0.0080277	0.006919	0.0039167	0.0088446	0.010068	0.011899
2531.8	0.011383	0.0077736	0.0050752	0.0093346	0.013354	0.012916
2530.9	0.010594	0.0093987	0.0090124	0.013996	0.012606	0.011297
2529.9	0.0080578	0.011506	0.01077	0.014238	0.0079187	0.0086665
2529	0.0090011	0.011816	0.0090713	0.011714	0.0080908	0.0081988
2528.1	0.010108	0.011716	0.0086512	0.0092176	0.010404	0.0088793
2527.1	0.0072964	0.01155	0.011084	0.0094457	0.011313	0.010614
2526.2	0.0095769	0.0089934	0.010601	0.010833	0.0094966	0.010298
2525.3	0.010592	0.0054885	0.0075949	0.010206	0.0071105	0.0080726
2524.3	0.0069693	0.0055309	0.007106	0.0092104	0.007129	0.0079519
2523.4	0.0070785	0.0085773	0.0082447	0.0099964	0.0077442	0.0091515
2522.5	0.0095552	0.0097388	0.0096713	0.012675	0.011786	0.0077033
2521.5	0.010811	0.009205	0.0099638	0.011457	0.012779	0.0082461
2520.6	0.011092	0.010978	0.0097891	0.0086376	0.0098416	0.0096059
2519.7	0.010213	0.012704	0.0094736	0.0082395	0.0091744	0.0095798
2518.7	0.0089129	0.0086078	0.0087935	0.0083129	0.011103	0.011044
2517.8	0.0088256	0.0056636	0.0089265	0.0091766	0.009621	0.01421
2516.9	0.01042	0.0086794	0.010564	0.010068	0.0069549	0.013151
2516	0.011245	0.0082335	0.0093703	0.00954	0.0072082	0.012169
2515	0.012329	0.0097612	0.0091822	0.0094082	0.0082779	0.011556
2514.1	0.011489	0.010384	0.0085245	0.0082514	0.0097479	0.0084503
2513.2	0.0093179	0.0080142	0.0066756	0.0067411	0.0094241	0.0082725
2512.2	0.010151	0.0071709	0.0083906	0.0084825	0.0088648	0.0095231
2511.3	0.012317	0.0076486	0.0099506	0.007787	0.0097875	0.0097452
2510.4	0.010003	0.0090513	0.009867	0.0061558	0.011501	0.0083906
2509.4	0.0069438	0.0091633	0.01026	0.0066336	0.0092778	0.0069017
2508.5	0.0074254	0.0096549	0.0093877	0.0054507	0.005099	0.0086912
2507.6	0.0077403	0.010734	0.0096387	0.0067802	0.0062226	0.01139
2506.6	0.0081841	0.010365	0.0078716	0.010144	0.0094257	0.010649
2505.7	0.0088694	0.0087175	0.0037066	0.009711	0.00988	0.0073536
2504.8	0.0082452	0.008275	0.0039148	0.007563	0.0074799	0.0062653
2503.8	0.0091282	0.0089018	0.0073422	0.0078433	0.0072837	0.0064082
2502.9	0.009951	0.0077316	0.0068641	0.009272	0.010562	0.0058208
2502	0.0109	0.0080243	0.0073276	0.0074794	0.011628	0.0071816
2501	0.010452	0.0090075	0.0077382	0.0058158	0.008285	0.0084534
2500.1	0.0073045	0.0097029	0.0064095	0.0076997	0.007374	0.0086187
2499.2	0.0066917	0.0096934	0.0077596	0.0097123	0.0081348	0.010041
2498.2	0.0067088	0.0083476	0.0087734	0.0090736	0.0060908	0.010748
2497.3	0.007453	0.0078846	0.009432	0.007655	0.0064815	0.0089947
2496.4	0.0082277	0.0078775	0.0090399	0.0063072	0.0083896	0.0086478
2495.5	0.0080553	0.006859	0.0077216	0.0071251	0.0072329	0.008955
2494.5	0.0095043	0.0069834	0.0053984	0.0093286	0.0063134	0.0084615
2493.6	0.0087451	0.0080158	0.0024952	0.0086884	0.0055839	0.0093593
2492.7	0.0088751	0.0093609	0.0038104	0.0073476	0.0072346	0.0097383
2491.7	0.0088905	0.010977	0.0077375	0.006798	0.0094658	0.0086882
2490.8	0.0057472	0.012446	0.0083793	0.0080075	0.0073663	0.01028
2489.9	0.0065582	0.011149	0.007878	0.0081812	0.0055608	0.010097
2488.9	0.0094263	0.0083177	0.007943	0.0073954	0.0076763	0.0068651
2488	0.0092689	0.0073403	0.0069783	0.007923	0.0078654	0.0063305
2487.1	0.0078156	0.009092	0.005316	0.010426	0.0066694	0.0076907
2486.1	0.0064054	0.0086538	0.0071135	0.011471	0.0078871	0.0078957
2485.2	0.0063086	0.0072613	0.0079129	0.0084461	0.0083632	0.0092456
2484.3	0.0067891	0.007482	0.0080537	0.0075023	0.0086733	0.0089
2483.3	0.0081617	0.006496	0.010407	0.01002	0.0082623	0.0058783
2482.4	0.0087577	0.0063951	0.010186	0.0072102	0.0080296	0.0053912
2481.5	0.0070885	0.006577	0.0089722	0.0057171	0.0083866	0.0085776
2480.5	0.0064721	0.0063913	0.0087632	0.0074171	0.0076407	0.0079594
2479.6	0.0060396	0.0084186	0.0073578	0.0062627	0.0067289	0.0058867
2478.7	0.0074684	0.010446	0.0056211	0.0056156	0.0034006	0.0075078
2477.7	0.0090031	0.0086169	0.0076573	0.0062606	0.0019966	0.0090948
2476.8	0.0075253	0.0070048	0.0086764	0.0091917	0.0066854	0.010016
2475.9	0.0073234	0.0060129	0.0072362	0.0096352	0.010677	0.0078796
2475	0.0069992	0.0048569	0.0079124	0.0072606	0.0077022	0.006163
2474	0.0059116	0.0063482	0.0085647	0.0072894	0.0049255	0.0061108
2473.1	0.006435	0.0061118	0.0066963	0.0074613	0.0063326	0.0060856
2472.2	0.0080497	0.0063141	0.00627	0.005932	0.0076448	0.0067866
2471.2	0.0089631	0.007356	0.0058977	0.0062341	0.007057	0.0068748
2470.3	0.0073822	0.0077678	0.0051998	0.0082723	0.0075474	0.0089949
2469.4	0.005905	0.0095363	0.0075563	0.0077153	0.0054872	0.0089994
2468.4	0.0065735	0.010068	0.0062299	0.0083586	0.002444	0.0056101
2467.5	0.0059658	0.0099441	0.004185	0.0097727	0.006091	0.0064353
2466.6	0.0059475	0.0089355	0.0057831	0.0094213	0.0095655	0.00871
2465.6	0.0048803	0.0062252	0.0066681	0.008169	0.0088913	0.0091429
2464.7	0.0041701	0.0053574	0.0044675	0.0077104	0.0092641	0.010079
2463.8	0.0069071	0.0083669	0.0047791	0.0090688	0.0089716	0.0090797
2462.8	0.009565	0.008174	0.0076227	0.0081322	0.0092766	0.0064033
2461.9	0.0092669	0.0073002	0.0094793	0.005534	0.010675	0.0058575
2461	0.0081585	0.0078662	0.0070536	0.0052272	0.0096971	0.0090998
2460	0.0064053	0.0068681	0.0047743	0.0067434	0.0075574	0.0086995
2459.1	0.0069285	0.0072709	0.005023	0.0091758	0.0067598	0.0079607
2458.2	0.0074625	0.0090725	0.006515	0.010045	0.0061542	0.0086705
2457.2	0.0062044	0.0094099	0.0091755	0.0098928	0.0076039	0.0087201
2456.3	0.0076728	0.0082777	0.0084353	0.0079661	0.010296	0.0065711
2455.4	0.0084155	0.0077844	0.0054451	0.0064544	0.009413	0.005602
2454.5	0.007523	0.0069573	0.00504	0.0053073	0.0074007	0.0054041
2453.5	0.0096573	0.0061313	0.0071406	0.0044613	0.0074688	0.0070795
2452.6	0.012108	0.0079456	0.0082104	0.0064677	0.0071275	0.010373
2451.7	0.0088947	0.0092451	0.007288	0.009235	0.0072165	0.0099534
2450.7	0.0048099	0.0072021	0.0077409	0.0082235	0.0071617	0.00778
2449.8	0.0058141	0.0071015	0.0084927	0.0060645	0.0066177	0.0090693
2448.9	0.0063576	0.007487	0.0078193	0.0049275	0.0077012	0.01082
2447.9	0.004676	0.0055635	0.0084424	0.0052432	0.0091566	0.0094161
2447	0.0032309	0.0056288	0.0088805	0.0044693	0.0091378	0.0078962
2446.1	0.0030994	0.0066146	0.008337	0.0034217	0.0074615	0.0074783
2445.1	0.005986	0.0070086	0.0076863	0.0064179	0.0074369	0.0070414
2444.2	0.0093203	0.00811	0.0058019	0.0088146	0.0065866	0.0075813
2443.3	0.0093291	0.0085934	0.0037257	0.0088095	0.0045526	0.0091229
2442.3	0.00859	0.0095353	0.0051938	0.010084	0.0047997	0.0077009
2441.4	0.0059055	0.009589	0.0077846	0.009716	0.0071531	0.0054735
2440.5	0.0053557	0.0087777	0.0071171	0.0084969	0.0093258	0.005443
2439.5	0.0081378	0.0075552	0.0078591	0.0090612	0.0095546	0.0070405
2438.6	0.0094467	0.0064046	0.010767	0.0079702	0.0066952	0.0079439
2437.7	0.0075253	0.0069577	0.011212	0.0076296	0.0057721	0.0068869
2436.7	0.0059213	0.006901	0.0086185	0.0084219	0.009838	0.0052416
2435.8	0.0064095	0.0053571	0.0087534	0.0075026	0.0097476	0.005679
2434.9	0.0072264	0.0044957	0.0097359	0.0071808	0.0060482	0.0079419
2434	0.0079821	0.0048564	0.0063954	0.0069635	0.0061951	0.0089241
2433	0.0072914	0.0071897	0.0039242	0.0057847	0.0082075	0.0073213
2432.1	0.0048328	0.0083939	0.0077737	0.0054208	0.0097687	0.0099577
2431.2	0.004841	0.0066142	0.010206	0.0068627	0.010805	0.010737
2430.2	0.0082699	0.0067002	0.0065148	0.0093243	0.0083873	0.0091127
2429.3	0.0088464	0.0071569	0.0061889	0.0094336	0.0071323	0.0089296
2428.4	0.0067499	0.0058208	0.0078142	0.0083185	0.0080371	0.0088774
2427.4	0.0068982	0.0057937	0.0084823	0.0073844	0.0080143	0.0072409
2426.5	0.0072813	0.0080351	0.0068437	0.0033833	0.0065358	0.0067448
2425.6	0.0077698	0.010502	0.0066289	0.0038757	0.0076925	0.0082182
2424.6	0.0094713	0.01059	0.0078934	0.0079371	0.0098539	0.0077301
2423.7	0.008203	0.008367	0.0060548	0.0089037	0.0091333	0.0060142
2422.8	0.0073848	0.0064725	0.0049441	0.0073141	0.0075618	0.0066099
2421.8	0.0071685	0.0074735	0.0075861	0.0048995	0.0077377	0.009709
2420.9	0.0049725	0.0080762	0.010585	0.004869	0.0093502	0.01094
2420	0.004545	0.0068111	0.012466	0.0066739	0.0096611	0.0090014
2419	0.0052435	0.0086604	0.0114	0.006493	0.0088999	0.007994
2418.1	0.0079924	0.010057	0.0069862	0.0061716	0.0084073	0.0055941
2417.2	0.010341	0.0067466	0.0050516	0.0075109	0.0066041	0.0031706
2416.2	0.0079016	0.0045416	0.0059406	0.0080293	0.0064335	0.0050941
2415.3	0.0057527	0.0060619	0.0064552	0.0083137	0.0062647	0.0068316
2414.4	0.0058356	0.0072943	0.0062865	0.0078567	0.004633	0.0083897
2413.5	0.0063828	0.0076416	0.0061826	0.0089176	0.0063129	0.0092405
2412.5	0.0064171	0.0084304	0.0073242	0.010962	0.0069925	0.0086108
2411.6	0.0073701	0.0081541	0.0079282	0.0089219	0.0060095	0.0081523
2410.7	0.0083832	0.0056442	0.0065709	0.0077933	0.0068259	0.0082931
2409.7	0.0069359	0.0048731	0.0050336	0.0075969	0.0087014	0.0083363
2408.8	0.0064662	0.0063222	0.0058187	0.0076061	0.0090572	0.008335
2407.9	0.0073176	0.0079287	0.0081162	0.0097814	0.0083198	0.0069549
2406.9	0.0069603	0.0090534	0.0091838	0.009962	0.0075249	0.0057692
2406	0.0075871	0.0073718	0.0096093	0.0075577	0.0079369	0.0087448
2405.1	0.0098518	0.0061094	0.0081832	0.0073076	0.010088	0.010625
2404.1	0.0099253	0.0077823	0.0075815	0.0072684	0.0097512	0.0090664
2403.2	0.010549	0.0092233	0.0084279	0.0075924	0.008657	0.0071395
2402.3	0.012257	0.0075644	0.0066985	0.0092592	0.0086872	0.006883
2401.3	0.011224	0.0052231	0.0059564	0.0099065	0.010197	0.0090612
2400.4	0.008692	0.0062907	0.0079216	0.0088749	0.0087747	0.010942
2399.5	0.0076581	0.0080185	0.0085469	0.0089979	0.0065152	0.011314
2398.5	0.0061935	0.0071128	0.009234	0.0081023	0.0070114	0.011453
2397.6	0.0059696	0.0060672	0.0091575	0.0047836	0.00805	0.011113
2396.7	0.0079861	0.0056698	0.0076888	0.0037317	0.0086687	0.01017
2395.7	0.0091414	0.0064843	0.0066898	0.0070543	0.0078752	0.0085969
2394.8	0.0088131	0.0075751	0.006803	0.0083268	0.0065051	0.0078111
2393.9	0.0087388	0.0083414	0.0076791	0.0073951	0.0075104	0.0078363
2393	0.0094771	0.0095766	0.007153	0.0068444	0.010413	0.0070765
2392	0.0087396	0.0092528	0.0076322	0.0066414	0.011276	0.0067578
2391.1	0.0075791	0.007276	0.0078492	0.0080051	0.0091141	0.0049732
2390.2	0.0067487	0.0066002	0.0068377	0.0090844	0.0090096	0.0045489
2389.2	0.0064248	0.0083932	0.0069616	0.0088137	0.0099182	0.0074696
2388.3	0.0071726	0.008068	0.0065006	0.0077246	0.0078944	0.0084748
2387.4	0.0075859	0.0069809	0.0058299	0.0065002	0.0073077	0.006524
2386.4	0.0083036	0.0075478	0.0073943	0.0061456	0.0083172	0.0059438
2385.5	0.00798	0.006359	0.0072464	0.0052323	0.0071516	0.0094714
2384.6	0.0069268	0.0063204	0.0071196	0.0055288	0.005187	0.011987
2383.6	0.0073546	0.0080415	0.008093	0.0070028	0.0050825	0.010366
2382.7	0.0078583	0.0091466	0.0068253	0.0075883	0.0048578	0.0090315
2381.8	0.0093577	0.0090679	0.0067261	0.0073354	0.0065098	0.0072233
2380.8	0.010612	0.0093026	0.0073084	0.0064183	0.0088053	0.0068902
2379.9	0.0099123	0.0092264	0.0080379	0.0073338	0.0072624	0.0095249
2379	0.0087368	0.004765	0.0086779	0.007298	0.0059535	0.010076
2378	0.0079918	0.00022989	0.0073543	0.0059145	0.0070957	0.0096646
2377.1	0.0071863	0.0013025	0.0044639	0.0052163	0.0058173	0.0068964
2376.2	0.0071836	0.0045796	0.0038336	0.0071562	0.0017176	0.0054196
2375.2	0.0071695	0.0060342	0.0054324	0.0086279	0.00080605	0.0080327
2374.3	0.0039676	0.0046642	0.0052172	0.0081529	0.0038858	0.007078
2373.4	0.0044907	0.0060411	0.0041742	0.0092085	0.0063999	0.0064788
2372.5	0.0082211	0.0097475	0.0036341	0.0099819	0.0064612	0.0064104
2371.5	0.0069842	0.0080571	0.0051783	0.0087947	0.0048112	0.0051558
2370.6	0.0045808	0.002079	0.0079817	0.0082442	0.0057427	0.0054355
2369.7	0.006168	-0.0014018	0.0056217	0.0072016	0.0086275	0.0053779
2368.7	0.0060508	-0.00062875	0.0011731	0.0052022	0.009666	0.0070915
2367.8	0.0055879	0.0026863	0.0033889	0.0066045	0.010571	0.0089888
2366.9	0.0069822	0.0047135	0.0067023	0.009688	0.0065011	0.0071594
2365.9	0.0074831	0.0050582	0.0049985	0.0080139	0.0034951	0.0064226
2365	0.0075161	0.0064443	0.0035108	0.0035642	0.0074941	0.010925
2364.1	0.0039056	0.0062447	0.0063241	0.003384	0.01225	0.011155
2363.1	0.0017384	0.0052338	0.0074511	0.0060079	0.010616	0.0055187
2362.2	0.0055571	0.004089	0.004672	0.0098913	0.0055419	0.0052216
2361.3	0.0080088	0.0029101	0.0031851	0.01162	0.0041865	0.0069155
2360.3	0.0075787	0.0042725	0.0031028	0.0077616	0.0055992	0.0051686
2359.4	0.009198	0.008666	-0.0005446	0.0051693	0.0060854	0.0071692
2358.5	0.011321	0.011539	-0.00083078	0.0036685	0.0043796	0.0090902
2357.5	0.010455	0.0076501	0.0021363	0.0033204	0.0038656	0.0065705
2356.6	0.008394	0.0026359	0.0022517	0.0065194	0.0040596	0.0074543
2355.7	0.0085755	0.00066214	0.0016812	0.0082065	0.0052997	0.0090632
2354.7	0.0090826	0.0031989	0.0028043	0.0064409	0.0062479	0.0046626
2353.8	0.0061566	0.0051057	0.0046618	0.0053004	0.0031544	-0.00044647
2352.9	0.0044936	0.0058558	0.0057983	0.007496	0.0042728	0.0012858
2352	0.005935	0.006194	0.0072979	0.0075673	0.0076952	0.0067971
2351	0.0069611	0.0061018	0.0095866	0.0059498	0.0064985	0.0082483
2350.1	0.0093573	0.0055601	0.0097102	0.0074694	0.0068789	0.0079028
2349.2	0.011121	0.0038332	0.0065417	0.010202	0.008639	0.0084796
2348.2	0.010696	0.003975	0.0039205	0.010146	0.0076809	0.0086968
2347.3	0.010371	0.004416	0.0042065	0.0080336	0.0053393	0.0070946
2346.4	0.006829	0.0036993	0.0043522	0.0046698	0.0040406	0.0053334
2345.4	0.0045536	0.0041118	0.0046691	0.0040488	0.0058709	0.0048894
2344.5	0.0072516	0.0050149	0.0063671	0.0048482	0.0052157	0.0037279
2343.6	0.0080913	0.0059792	0.0052491	0.0072048	0.0030959	0.0052381
2342.6	0.0051902	0.0071716	0.0056322	0.0085924	0.004312	0.009818
2341.7	0.0030668	0.0072227	0.0083138	0.0066153	0.0070508	0.012553
2340.8	0.0068921	0.0063361	0.0095741	0.003069	0.0067111	0.01083
2339.8	0.0099766	0.0066936	0.0081838	0.0021075	0.006612	0.0044495
2338.9	0.010015	0.0086955	0.0074687	0.0065623	0.010107	0.0022427
2338	0.0093734	0.0075999	0.0067133	0.0088909	0.0091168	0.007547
2337	0.0085046	0.0048597	0.0053344	0.0064551	0.0069187	0.010599
2336.1	0.0075068	0.004385	0.0053061	0.0074664	0.0085941	0.011899
2335.2	0.0070152	0.0064068	0.0056391	0.01063	0.0081248	0.011917
2334.2	0.0074537	0.0063631	0.0069602	0.0099135	0.0063847	0.0074501
2333.3	0.0070661	0.0050548	0.0069268	0.0087968	0.0067739	0.0065302
2332.4	0.0063875	0.0060797	0.007793	0.0095937	0.0055752	0.0079662
2331.4	0.005472	0.0069688	0.0076013	0.011641	0.0015815	0.006213
2330.5	0.0067894	0.01067	0.0072404	0.011044	0.0028275	0.0034865
2329.6	0.010609	0.013648	0.0094619	0.0075175	0.006122	0.0036015
2328.7	0.012084	0.010852	0.010174	0.005779	0.0040335	0.0072411
2327.7	0.0099329	0.0089025	0.0095449	0.0052615	0.0026554	0.010139
2326.8	0.0076943	0.0086085	0.0073342	0.0031034	0.0047636	0.0094409
2325.9	0.008023	0.0071344	0.0036508	0.0025505	0.0074788	0.0077221
2324.9	0.0090551	0.0073866	0.0050379	0.0042882	0.0076584	0.0068475
2324	0.0085768	0.0082767	0.0070594	0.0063008	0.0064526	0.0064975
2323.1	0.008972	0.0068037	0.0073291	0.0056188	0.0080391	0.0081469
2322.1	0.0089723	0.0065827	0.0092672	0.0049953	0.0094912	0.0088023
2321.2	0.007276	0.0069976	0.0090716	0.0041267	0.0076763	0.0070302
2320.3	0.0048655	0.0057	0.0071251	0.0072208	0.0066219	0.0062816
2319.3	0.0066657	0.0054997	0.0057464	0.007971	0.0071896	0.0080069
2318.4	0.010307	0.0064653	0.0063441	0.0063388	0.0071649	0.0083789
2317.5	0.0090641	0.0044049	0.0067933	0.0067549	0.0073429	0.0069555
2316.5	0.0064748	0.0027957	0.006424	0.010735	0.0072857	0.0058425
2315.6	0.0072705	0.0059427	0.010624	0.010695	0.0079445	0.0064373
2314.7	0.0081606	0.0070909	0.014279	0.00874	0.0087335	0.0089493
2313.7	0.0047163	0.0077769	0.012127	0.010181	0.0087082	0.0094317
2312.8	0.0026695	0.012247	0.0092329	0.011696	0.00754	0.008522
2311.9	0.005999	0.011824	0.0077947	0.0082548	0.0078357	0.0075201
2310.9	0.0079045	0.0076642	0.0063718	0.0048558	0.010094	0.0064007
2310	0.0075962	0.0079884	0.0068534	0.0071606	0.0089686	0.0075857
2309.1	0.0088767	0.010042	0.0082212	0.0094645	0.008104	0.0095999
2308.2	0.0083818	0.010838	0.0082112	0.0098371	0.0080246	0.010562
2307.2	0.007614	0.010401	0.0072037	0.0083031	0.0058179	0.0093718
2306.3	0.0095106	0.0088761	0.0066097	0.0055185	0.0057436	0.0070135
2305.4	0.0097136	0.0082696	0.0075626	0.0051922	0.0071027	0.0085988
2304.4	0.0077643	0.0094936	0.0090349	0.0070061	0.0091002	0.011576
2303.5	0.0063235	0.011099	0.0090312	0.0080042	0.0092789	0.011637
2302.6	0.0070056	0.011098	0.0074023	0.0074239	0.0081475	0.010244
2301.6	0.0074272	0.0096556	0.0061026	0.0076687	0.0084466	0.0094042
2300.7	0.0066573	0.0083094	0.0071824	0.00771	0.0080684	0.010106
2299.8	0.0070498	0.0080012	0.0086579	0.0060772	0.0098011	0.010461
2298.8	0.0077932	0.0083247	0.0079824	0.005842	0.010662	0.011634
2297.9	0.0086127	0.0086192	0.0056681	0.0076487	0.010513	0.011182
2297	0.0096788	0.0086273	0.0070376	0.010038	0.012058	0.0092061
2296	0.0087569	0.007384	0.0093765	0.0094336	0.010543	0.0093699
2295.1	0.0073269	0.0068188	0.0092868	0.0075307	0.0081266	0.0088459
2294.2	0.0078215	0.0080358	0.0087073	0.0080073	0.0085512	0.0081316
2293.2	0.0085786	0.0085634	0.0076585	0.0086925	0.0081046	0.0086288
2292.3	0.0090894	0.0083808	0.0077926	0.0089557	0.0069606	0.0088172
2291.4	0.0092967	0.0094967	0.0084817	0.0081904	0.0069878	0.0088491
2290.4	0.0083678	0.010655	0.0085596	0.0063807	0.0070437	0.0085328
2289.5	0.008687	0.010413	0.007468	0.0055992	0.0067441	0.0089724
2288.6	0.00922	0.0092841	0.0067564	0.0067907	0.0076601	0.008937
2287.7	0.0077094	0.0088697	0.0082581	0.0073866	0.0094741	0.006414
2286.7	0.0077037	0.0079562	0.0079069	0.0058274	0.010968	0.0059416
2285.8	0.007904	0.0066354	0.0063937	0.0046945	0.011094	0.0085263
2284.9	0.0071518	0.0072079	0.0068572	0.005354	0.0085838	0.010057
2283.9	0.0077877	0.0071054	0.0073354	0.0060122	0.0078242	0.0093187
2283	0.0092985	0.0068145	0.0093726	0.0061878	0.0094137	0.0080331
2282.1	0.0096239	0.0088552	0.010802	0.0063774	0.0088851	0.0074523
2281.1	0.0082342	0.010676	0.0078477	0.0067217	0.0079949	0.0069626
2280.2	0.0075924	0.010728	0.0062944	0.0084038	0.0089022	0.0081779
2279.3	0.007124	0.010359	0.0086782	0.010381	0.0094997	0.0092491
2278.3	0.0048876	0.0094471	0.010388	0.0099069	0.0091774	0.0074179
2277.4	0.0031512	0.008041	0.0089936	0.0081811	0.0090175	0.0071815
2276.5	0.0050137	0.0072389	0.0070127	0.0075638	0.0089159	0.0079819
2275.5	0.0076648	0.0067543	0.0072957	0.0066758	0.0096822	0.0085246
2274.6	0.0079886	0.006757	0.0072711	0.0043287	0.010098	0.010067
2273.7	0.0083625	0.0085185	0.0065935	0.002821	0.0088857	0.0097045
2272.7	0.0080656	0.010125	0.0073312	0.0036747	0.0083567	0.0082634
2271.8	0.0073611	0.0098044	0.0082576	0.0056938	0.0070126	0.0091911
2270.9	0.0070906	0.0082748	0.007942	0.0069374	0.0065009	0.0097195
2269.9	0.006948	0.0079632	0.0079825	0.0089047	0.0093664	0.0080873
2269	0.0086657	0.0084143	0.0076996	0.010311	0.010183	0.0083678
2268.1	0.01003	0.0086498	0.0067668	0.0095423	0.0083055	0.0092975
2267.2	0.0085235	0.0086062	0.0058327	0.0084832	0.007668	0.0089477
2266.2	0.0064658	0.0082651	0.0066038	0.0091312	0.0079286	0.01023
2265.3	0.0055651	0.0098485	0.0095775	0.0098141	0.0081077	0.010259
2264.4	0.0049361	0.010888	0.011101	0.0083522	0.0084232	0.0083596
2263.4	0.0047178	0.0093954	0.009678	0.0071921	0.0069464	0.0071369
2262.5	0.0048287	0.0084304	0.0073019	0.0054368	0.006764	0.0080499
2261.6	0.005186	0.0075674	0.007295	0.0046384	0.0090386	0.009708
2260.6	0.0053109	0.0063321	0.0089328	0.0064822	0.0079829	0.0090844
2259.7	0.005281	0.0081946	0.0073907	0.007178	0.0063624	0.008017
2258.8	0.0076442	0.0098848	0.0055789	0.0080949	0.0069504	0.0089832
2257.8	0.00971	0.0087807	0.0063256	0.0090219	0.0067937	0.0089909
2256.9	0.0079	0.0077362	0.0066359	0.0092458	0.0065063	0.0079955
2256	0.0066769	0.006998	0.0081747	0.010082	0.0065296	0.0090277
2255	0.0077882	0.0075012	0.0081418	0.0097237	0.0075681	0.010425
2254.1	0.0068295	0.0085477	0.0058843	0.0081348	0.0093179	0.010003
2253.2	0.0056187	0.0082062	0.0081754	0.00563	0.0089493	0.0086203
2252.2	0.006203	0.0094714	0.0098388	0.0038136	0.0075334	0.008242
2251.3	0.0066768	0.011234	0.0076656	0.0051978	0.0076153	0.0083501
2250.4	0.0063968	0.0098406	0.0089707	0.006224	0.0094053	0.0084625
2249.4	0.0061231	0.0081507	0.011666	0.0062191	0.0096442	0.0078617
2248.5	0.0059107	0.0068689	0.0090049	0.0072443	0.0086217	0.0073417
2247.6	0.0063436	0.0077455	0.0060525	0.0083109	0.0077294	0.0080856
2246.7	0.0085315	0.0082152	0.0065409	0.0075547	0.0070423	0.0083166
2245.7	0.0095164	0.0067007	0.009844	0.0067022	0.0079787	0.008949
2244.8	0.0070441	0.0071774	0.011667	0.00571	0.0088276	0.0095098
2243.9	0.0061857	0.0083289	0.010525	0.0040974	0.0080937	0.00957
2242.9	0.0071163	0.00928	0.010068	0.0053346	0.0085883	0.0091891
2242	0.0064085	0.009426	0.0092637	0.0069102	0.010303	0.0086065
2241.1	0.0061562	0.0083419	0.0086255	0.0062854	0.0097407	0.0083159
2240.1	0.0080392	0.0081585	0.0079512	0.0076657	0.0090696	0.0082784
2239.2	0.0094747	0.007521	0.0077176	0.0099666	0.0089877	0.0090657
2238.3	0.0093872	0.0066986	0.0083684	0.010744	0.0073227	0.0090866
2237.3	0.008943	0.0081152	0.0072836	0.0096982	0.0066085	0.0086254
2236.4	0.0073532	0.009444	0.0066881	0.006769	0.0075052	0.0085323
2235.5	0.0052893	0.0081797	0.0075687	0.0056086	0.00773	0.0087003
2234.5	0.004835	0.006668	0.0074747	0.0057903	0.0076758	0.0083099
2233.6	0.0055775	0.0069187	0.0065249	0.0066824	0.0083164	0.0068476
2232.7	0.0072431	0.0067117	0.0056826	0.0078624	0.0081622	0.0073619
2231.7	0.0085672	0.0053914	0.0056024	0.0070991	0.0065331	0.0090758
2230.8	0.0075503	0.0065665	0.0075489	0.0056774	0.0054238	0.0082089
2229.9	0.0071779	0.0081801	0.0079089	0.0062352	0.0061647	0.0082625
2228.9	0.0079103	0.0092079	0.0065445	0.0065472	0.0081088	0.0092587
2228	0.0063591	0.010452	0.0076937	0.0062285	0.0080272	0.0093891
2227.1	0.0067558	0.0096508	0.0080299	0.0066784	0.0076021	0.0097874
2226.2	0.0096417	0.0083211	0.0080456	0.0066727	0.0080176	0.0091161
2225.2	0.0091743	0.0086283	0.0091665	0.0063735	0.0086157	0.0093386
2224.3	0.0070086	0.009147	0.0080371	0.0071915	0.0090697	0.01103
2223.4	0.0071921	0.008269	0.0076446	0.0077355	0.0079243	0.010803
2222.4	0.0077935	0.0072848	0.0095679	0.007781	0.0080738	0.0098594
2221.5	0.0074765	0.0076109	0.0099133	0.0085128	0.0099138	0.0093749
2220.6	0.0073626	0.0080464	0.0095953	0.0096188	0.0091088	0.0081895
2219.6	0.0078885	0.0086367	0.0096618	0.0089358	0.0090698	0.007945
2218.7	0.0069137	0.0075897	0.0080657	0.0068229	0.010769	0.00955
2217.8	0.0059322	0.0057348	0.0084461	0.0062538	0.0088136	0.0096562
2216.8	0.0064456	0.006861	0.0091879	0.0075443	0.0069791	0.0093635
2215.9	0.0073408	0.0083016	0.0084206	0.0086027	0.0082398	0.0097069
2215	0.0066987	0.007073	0.0075241	0.0075743	0.0089451	0.0091437
2214	0.0060793	0.0065909	0.0070342	0.0060711	0.0085029	0.0082448
2213.1	0.0072284	0.0085731	0.0083436	0.0073752	0.007282	0.0080642
2212.2	0.0078483	0.0085048	0.0092205	0.0092876	0.0075405	0.0078143
2211.2	0.00671	0.0074801	0.008061	0.0076102	0.0083079	0.0075608
2210.3	0.0062051	0.0071662	0.0075284	0.0070737	0.0070098	0.0075143
2209.4	0.0075477	0.0073775	0.0084119	0.0081392	0.0068095	0.0080076
2208.4	0.0087278	0.008182	0.0092365	0.007159	0.008696	0.009421
2207.5	0.0077654	0.0069657	0.0085589	0.0057097	0.0086555	0.011376
2206.6	0.006716	0.0075758	0.0080269	0.0057398	0.0071353	0.012394
2205.7	0.0083111	0.0090805	0.0093863	0.0075759	0.0075645	0.010343
2204.7	0.0088442	0.0084942	0.010473	0.0077537	0.0089176	0.0075167
2203.8	0.0079687	0.0078171	0.0086994	0.0060378	0.0089372	0.0073469
2202.9	0.0069095	0.0087423	0.0055015	0.0065553	0.0084678	0.0098119
2201.9	0.0067424	0.0077606	0.0051513	0.0093029	0.0079401	0.010549
2201	0.0065532	0.0066758	0.0078739	0.0097287	0.0088445	0.0079545
2200.1	0.0068484	0.0089474	0.0090025	0.0078651	0.010648	0.0069634
2199.1	0.0078508	0.0093836	0.0076721	0.007339	0.01023	0.0074781
2198.2	0.0073247	0.0077094	0.0066269	0.0061145	0.008384	0.0082569
2197.3	0.0060037	0.0066062	0.0070771	0.0039532	0.0076613	0.0083801
2196.3	0.0063092	0.0072406	0.0089329	0.0047458	0.0086916	0.008518
2195.4	0.0083848	0.009041	0.009252	0.0055022	0.0091417	0.0086231
2194.5	0.0090808	0.0084245	0.0070584	0.005012	0.0083347	0.0081045
2193.5	0.0083999	0.0066222	0.0067808	0.0060779	0.0072346	0.0091003
2192.6	0.0080254	0.0070921	0.0086268	0.0078559	0.0071039	0.0091002
2191.7	0.0065408	0.0063016	0.0076525	0.008378	0.0089742	0.0086431
2190.7	0.0051605	0.0057842	0.0044514	0.007151	0.0091862	0.0096096
2189.8	0.0055832	0.0071763	0.0051928	0.0077245	0.0079507	0.0085696
2188.9	0.0068254	0.0083155	0.0075492	0.008358	0.0076823	0.0079378
2187.9	0.0075681	0.0084205	0.0087866	0.0078271	0.0089787	0.0093489
2187	0.007573	0.008033	0.0097433	0.0070134	0.010252	0.0094824
2186.1	0.0080642	0.006938	0.0097828	0.0063105	0.0087698	0.010479
2185.2	0.0088212	0.0071233	0.0083155	0.0080527	0.0069042	0.010862
2184.2	0.0083152	0.008486	0.0079752	0.0092518	0.0066843	0.0087023
2183.3	0.0066971	0.0083508	0.007603	0.00804	0.0080198	0.0065577
2182.4	0.0049062	0.0087093	0.0085249	0.0089464	0.0090312	0.0060901
2181.4	0.0046738	0.010722	0.0091597	0.0099806	0.0091942	0.0088069
2180.5	0.0066604	0.011627	0.0083394	0.0083912	0.007668	0.010268
2179.6	0.0076585	0.010492	0.0086385	0.0088249	0.0073993	0.010398
2178.6	0.0073647	0.010198	0.0084407	0.010541	0.0085978	0.011011
2177.7	0.0082096	0.0092112	0.0092127	0.008515	0.0081622	0.010845
2176.8	0.0068843	0.0079108	0.010031	0.0079459	0.0077612	0.010514
2175.8	0.0064162	0.0073673	0.0082452	0.0088758	0.0090676	0.0095265
2174.9	0.0063765	0.0075328	0.00664	0.0060783	0.0093211	0.0078255
2174	0.0068158	0.0078116	0.0064963	0.0029334	0.0069197	0.0079747
2173	0.0076149	0.0072046	0.0069196	0.0047523	0.0062911	0.009245
2172.1	0.0090049	0.0073503	0.0073427	0.0075517	0.0085903	0.0092294
2171.2	0.010977	0.0090163	0.0080147	0.0080307	0.010488	0.0088889
2170.2	0.0095946	0.01059	0.0077664	0.0072325	0.011345	0.0088672
2169.3	0.0064325	0.0095463	0.0072703	0.0066579	0.0097898	0.0085146
2168.4	0.0055898	0.0080272	0.0074146	0.0063316	0.0087244	0.0075274
2167.4	0.0062861	0.00841	0.0089999	0.0063552	0.0088666	0.0070605
2166.5	0.0068182	0.0092281	0.0097234	0.0090707	0.0080523	0.0087745
2165.6	0.0086701	0.0099557	0.0076003	0.010692	0.0065491	0.010454
2164.7	0.0096018	0.010254	0.0063502	0.0082084	0.0054297	0.0088232
2163.7	0.0092016	0.0080158	0.0075377	0.006799	0.0075225	0.0063009
2162.8	0.0073578	0.0067585	0.0090782	0.0067275	0.0095678	0.0056263
2161.9	0.0065005	0.0068976	0.009293	0.0074491	0.0096166	0.0085002
2160.9	0.0074949	0.0074298	0.0089201	0.0082037	0.0097078	0.010437
2160	0.0086394	0.0080876	0.008224	0.0080108	0.0090781	0.0088358
2159.1	0.0090707	0.0095128	0.0092522	0.0092338	0.0094266	0.0087709
2158.1	0.0083078	0.010123	0.012074	0.010076	0.0092309	0.0097703
2157.2	0.0074819	0.0091581	0.012349	0.0090939	0.0087272	0.010146
2156.3	0.0079339	0.009503	0.0094266	0.0072711	0.0085093	0.010627
2155.3	0.007821	0.0086582	0.0086981	0.0061724	0.0081946	0.010985
2154.4	0.0072336	0.0068705	0.010319	0.0057442	0.0077345	0.01087
2153.5	0.0067817	0.0074508	0.010145	0.0070708	0.0065228	0.010138
2152.5	0.0063923	0.0081327	0.0081748	0.0074422	0.0063163	0.0089872
2151.6	0.0075842	0.0079551	0.0074945	0.006865	0.0073122	0.0079143
2150.7	0.0094666	0.008555	0.0081115	0.0071171	0.007461	0.0070022
2149.7	0.0097725	0.0078217	0.0082479	0.0077748	0.0057723	0.0080875
2148.8	0.0075611	0.0075806	0.0079334	0.0089625	0.0060226	0.010093
2147.9	0.0080357	0.0085741	0.006846	0.0086685	0.007072	0.010918
2146.9	0.010624	0.010016	0.0055112	0.0090935	0.0076838	0.011426
2146	0.0095736	0.011397	0.0086773	0.0098177	0.0087125	0.010414
2145.1	0.0080664	0.011119	0.010597	0.0079768	0.0086929	0.0090137
2144.2	0.0084203	0.0107	0.0088221	0.0063429	0.0084851	0.0085016
2143.2	0.0079208	0.011241	0.008676	0.0063187	0.0085854	0.0076926
2142.3	0.0078396	0.012054	0.0096823	0.0075954	0.0093862	0.0082086
2141.4	0.0091944	0.010383	0.010187	0.0078729	0.010455	0.010034
2140.4	0.0079823	0.009306	0.0082375	0.0086808	0.009641	0.011429
2139.5	0.0055262	0.010877	0.0077337	0.0077022	0.010427	0.011576
2138.6	0.0064146	0.0097735	0.0087211	0.0051977	0.010592	0.0096706
2137.6	0.0087727	0.0072971	0.0083095	0.006665	0.0093811	0.0082989
[truncated: 1,596 more rows]
